# Supplementary material for: Frequent alcohol, nicotine or cannabis use is common in young persons presenting for mental healthcare: a cross-sectional study
Source: PubMed Central journal article supplement — BMJ Open. 2013 Feb 2;3(2):e002229. doi: 10.1136/bmjopen-2012-002229 (PMC3586076; doi:10.1136/bmjopen-2012-002229), 2013-02-02
Supplement: bmjopen-2012-002229.draft_revisions.pdf [file bmjopen-2012-002229.draft_revisions.pdf]

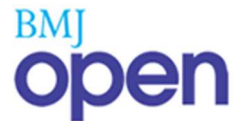

**Frequent alcohol, nicotine or cannabis use is common in young persons presenting for mental health care: a cross-sectional study**

|                                 |                                                                                                                                                                                                                                                                                                                                                                                                             |
|---------------------------------|-------------------------------------------------------------------------------------------------------------------------------------------------------------------------------------------------------------------------------------------------------------------------------------------------------------------------------------------------------------------------------------------------------------|
| Journal:                        | <i>BMJ Open</i>                                                                                                                                                                                                                                                                                                                                                                                             |
| Manuscript ID:                  | bmjopen-2012-002229                                                                                                                                                                                                                                                                                                                                                                                         |
| Article Type:                   | Research                                                                                                                                                                                                                                                                                                                                                                                                    |
| Date Submitted by the Author:   | 16-Oct-2012                                                                                                                                                                                                                                                                                                                                                                                                 |
| Complete List of Authors:       | Hermens, Daniel; Brain & Mind Research Institute , Scott, Elizabeth; Brain & Mind Research Institute, White, Django; Brain & Mind Research Institute, Lynch, Marta; Brain & Mind Research Institute, Lagopoulos, Jim; Brain & Mind Research Institute, Whitwell, Bradley; Brain & Mind Research Institute, Naismith, Sharon; Brain & Mind Research Institute, Hickie, Ian; Brain & Mind Research Institute, |
| <b>Primary Subject Heading</b>: | Mental health                                                                                                                                                                                                                                                                                                                                                                                               |
| Secondary Subject Heading:      | Addiction, Smoking and tobacco                                                                                                                                                                                                                                                                                                                                                                              |
| Keywords:                       | ALCOHOL, DEPRESSION, MENTAL HEALTH, PSYCHIATRY, Substance misuse < PSYCHIATRY, Schizophrenia & psychotic disorders < PSYCHIATRY                                                                                                                                                                                                                                                                             |
|                                 |                                                                                                                                                                                                                                                                                                                                                                                                             |

SCHOLARONE™  
Manuscripts

only

1  
2  
3  
4  
5  
6  
7  
8  
9  
10  
11  
12  
13  
14  
15  
16  
17  
18  
19  
20  
21  
22  
23  
24  
25  
26  
27  
28  
29  
30  
31  
32  
33  
34  
35  
36  
37  
38  
39  
40  
41  
42  
43  
44  
45  
46  
47  
48  
49  
50  
51  
52  
53  
54  
55  
56  
57  
58  
59  
60

# Frequent alcohol, nicotine or cannabis use is common in young persons presenting for mental health care: a cross-sectional study

Daniel F. Hermens<sup>1\*</sup>, Elizabeth M. Scott<sup>1</sup>, Django White<sup>1</sup>, Marta Lynch<sup>1</sup>, Jim Lagopoulos<sup>1</sup>, Bradley  
G. Whitwell<sup>1</sup>, Sharon L. Naismith<sup>1</sup>, Ian B. Hickie<sup>1</sup>

<sup>1</sup>. Clinical Research Unit, Brain and Mind Research Institute, University of Sydney, Australia.

## \*Correspondence

Address: Brain & Mind Research Institute, University of Sydney, 100 Mallett Street, Camperdown,  
NSW 2050, Australia.

Email: [daniel.hermens@sydney.edu.au](mailto:daniel.hermens@sydney.edu.au)

Telephone: +61 2 93510529

Facsimile: +61 2 93510652

## Abstract

*Objectives:* To determine the prevalence of recent alcohol, nicotine or cannabis use in young persons presenting for mental health care.

*Design:* A cross-sectional study of young people seeking mental health care completed self-report questionnaires regarding their use of alcohol, nicotine or cannabis.

*Setting:* Data were collected from two sites as part of the national *headspace* services program.

*Participants:* 2,122 young people age 12 to 30 years provided information as part of a patient register; a subset of N=522 participants also provided more detailed information about their patterns of alcohol use.

*Outcome measures:* Prevalence of levels of recent alcohol, nicotine or cannabis use within relevant age bands (12-17, 18-19 and 20-30) or primary diagnostic categories.

*Results:* The rates for use *at least weekly* of alcohol for the three age bands were 12%, 39% and 45%, and for cannabis 7%, 14% and 18%, respectively. The rates of *daily* nicotine use for the three age bands were 23%, 36% and 41%. The pattern of alcohol use was characterised by few abstainers as well as many risky drinkers. Age of onset across all three substances was approximately 15 years. Individuals who used any of the three substances more frequently were likely to be older, male or have psychotic or bipolar disorders.

*Conclusions:* Frequent use of alcohol, nicotine or cannabis use in young people seeking mental health care is common. Given restricted legal access, the patterns of use in those aged 12-17 years are particularly notable. Reductions in substance use needs to be prioritised within services for at-risk young people.

## Article summary

### *Article focus:*

- Previous studies indicate that early substance misuse increases the risk of developing a mental illness;
- Early onset mental disorders are associated with increased risk of alcohol or other substance misuse;
- In this study, we determined the rates of alcohol, nicotine or cannabis use in young persons (aged 12 to 30 years) entering mental health care.

### *Key messages:*

- Alcohol, nicotine or cannabis uses in young people who present for mental health care are common and frequent;
- Given the comorbidity with significant mental health problems, these patterns of frequent substance use are likely to contribute to increased risk of poor physical and/or mental health outcomes;
- Reductions in use of these substances needs to be prioritised within services provided to these at-risk young people.

### *Strengths and limitations of this study:*

- A cross-sectional study of a large number of young persons seeking mental health care;
- Findings in the 12 to 17 year old age group are particularly novel;
- Key substance use measures were self-report only and not confirmed by interview;
- Participants were not asked about the amount of nicotine and cannabis use.

## Introduction

Health prevention priorities in Australia include cessation of nicotine or cannabis use and reduction in alcohol-related harm[1-3]. Among those with mental illness, reductions in substance use-related harm and improved cardiovascular health are key clinical objectives. Epidemiological and longitudinal studies indicate that early substance misuse increases the risk of developing a mental illness and, conversely, early onset mental disorders are associated with increased risk of alcohol or other substance misuse[4-6].

Neurobiological studies increasingly demonstrate the adverse effects of alcohol or cannabis on brain development in teenagers and young adults[7]. Young people with mental disorders are at increased risk of later cardiovascular disease[8]. One of the most significant modifiable risk factors in this population appears to be cigarette smoking.

Within the new primary-care based mental health initiative, *headspace*: the national youth mental health foundation, a strong policy emphasis is placed on active management of alcohol or other substance-misuse problems. While it is clear that these new centres have the capacity to engage young people, the extent to which concurrent alcohol, nicotine or other substance misuse is being actively managed is yet to be identified.

From a physical health perspective, there is an urgent need to establish an early intervention agenda for these individuals who are at high risk of premature death or physical health morbidity from a range of medical conditions. Of particular note are the high rates of premature death due to cardiovascular disease in persons with depression and the prevalence of metabolic syndrome in those receiving treatments for major mood disorders. Additionally, the high rate of nicotine and cannabis use in young people with major mental health disorders puts them at risk of other smoking-related conditions. In this study, we determined the rates of alcohol, nicotine or cannabis

1  
2 use in young persons entering mental health care. Additionally, we sought to assess the patterns of  
3  
4 comorbidity with specific mental disorders.  
5  
6

## 7 8 **Methods** 9

10  
11 Participants aged 16 years or older provided their own written informed consent and  
12 parental/guardian consent was obtained for those under 16 years. The University of Sydney Human  
13  
14 Research Ethics Committee approved the study.  
15  
16

17  
18  
19 Sample(s): Participants were recruited from two headspace[9] sites: (i) the Brain & Mind Research  
20  
21 Institute, Camperdown; and (ii) Campbelltown (outer suburban, south-western Sydney). These  
22  
23 services specialise in the assessment and early intervention of mental health problems in young  
24  
25 people[10, 11].  
26  
27

28  
29  
30 This study utilised data obtained from 2,122 young people (12 to 30 years) who entered our patient  
31  
32 register. A subset of 522 participants also took part in specialised neurobiological research related  
33  
34 to clinical outcomes. Participants were excluded if they did not have sufficient English-language  
35  
36 skills. Hereafter, the entire sample (N=2,112) is referred to as the 'Youth Mental Health' (YMH)  
37  
38 cohort. Referring clinicians were asked to determine primary and secondary diagnoses based on  
39  
40 DSM-IV criteria. For the purposes of this study, patients were then grouped into the relevant broad  
41  
42 categories (primary diagnoses) of 'depression', 'bipolar', 'anxiety', 'psychosis',  
43  
44 'behavioural/developmental', 'other' (which included autistic spectrum, learning disorder,  
45  
46 substance use disorders, and personality disorders), and 'unclear', as described in our previous  
47  
48 study[11].  
49  
50

51  
52  
53 Assessment: Clinical information was obtained via: (i) brief self-report questionnaire; and (ii)  
54  
55 clinical assessment (detailed methods have been described previously[10, 11]).  
56  
57  
58  
59  
60

1  
2  
3  
4  
5  
6  
7  
8  
9  
10  
11  
12  
13  
14  
15  
16  
17  
18  
19  
20  
21  
22  
23  
24  
25  
26  
27  
28  
29  
30  
31  
32  
33  
34  
35  
36  
37  
38  
39  
40  
41  
42  
43  
44  
45  
46  
47  
48  
49  
50  
51  
52  
53  
54  
55  
56  
57  
58  
59  
60

*Self-report:* The questionnaire comprised basic demographic data as well as standardised questionnaires to measure common symptoms, psychosocial functioning, disability and vocational status upon entry to the service (findings reported previously[10, 11]). Participants were asked about their lifetime and current substance use using the first two items of the World Health Organization's 'alcohol, smoking and substance involvement screening test' (WHO-ASSIST)[12]. In item 1, participants were asked whether they ever used: (a) tobacco (nicotine) products; (b) alcoholic beverages; or, (c) cannabis. Subsequently, item 2 asked whether their use of each substance in the *past 3 months* was: (a) 'never'; (b) 'once or twice'; (c) 'monthly'; (d) 'weekly'; (e) 'daily or almost daily'.

*Data Reduction:* As a means to compare recent alcohol, nicotine or cannabis use in the YMH cohort with that of the general population the WHO-ASSIST item 2 data were re-categorised to align with the age bands and use categories of the 2010 National Drug Strategy Household Survey (NDSHS)[13]. Thus, responses were re-categorised as: (i) 'daily or almost daily'; (ii) 'weekly'; (iii) 'less than weekly' or (iv) 'never'. That is, responses of 'once or twice' and 'monthly' were collapsed to form the 'less than weekly' category. Furthermore, the YMH cohort was stratified into three age groups: (i) 12 to 17 years; (ii) 18 to 19 years; and (iii) 20 to 30 years.

*Clinical assessment:* Undertaken by psychiatrists, psychologists, mental health nurses or general practitioners with training in mental health. The assessing clinician verified key aspects such as primary and secondary diagnoses/comorbidities, vocational status, medical comorbidity and general functioning via the social and occupational function assessment scale (SOFAS)[14].

*Detailed assessment of alcohol use:* For the sub-sample (N=522) only, the Alcohol Use Disorders Identification Test (AUDIT) was used to assess each participant's level of risky drinking in the past year, as well as their lifetime familiarity[15, 16]. Total scores range of from 0-40, with a higher score indicating more problematic drinking. A total score of 1 to 7 is indicative of low risk drinking;

total scores 8-15 indicate 'risky drinking' with a moderate risk of harm; 16-19 indicating a high-risk or 'harmful' level of alcohol consumption, and 20-40 indicates a 'high-risk' level.

*Statistical Analyses:* Statistics were performed using SPSS for Windows 20.0. Group differences in demographic and clinical variables were assessed via ANOVA or chi-square tests. To determine whether age was a contributing factor to observed differences in prevalence of recent substance use across diagnostic groups, logistic regressions were conducted with a dichotomous dependent variable of 'at least weekly' versus 'less than weekly' use.

## Results

### *Lifetime use*

Among males, three quarters (75.9%; 506/667) of respondents (12 to 30 yrs) reported a lifetime use of alcohol, 63.3% (401/633) a lifetime use of nicotine and more than half (57.9%; 390/673) a lifetime use of cannabis. Similarly, for females, the lifetime rates were 75.6% (573/758), 60.3% (290/440) and 51.3% (391/762), respectively.

### *Age of first use*

For males, the self-reported 'age of first use' for each substance was as follows: (i) alcohol =  $14.6 \pm 2.4$  yrs (N=456); (ii) nicotine =  $14.0 \pm 2.6$  yrs (N=385); and (iii) cannabis =  $14.8 \pm 2.9$  yrs (N=127). For females, the age of first use for each substance was: (i) alcohol =  $14.6 \pm 2.3$  yrs (N=531); (ii) nicotine =  $14.2 \pm 2.4$  yrs (N=414); and (iii) cannabis =  $15.6 \pm 3.0$  yrs (N=126). The age of first use of cannabis was significantly earlier in males [ $F(1, 252)=5.7, p<.05$ ].

### *Recent use*



1  
2 The prevalence of each category of alcohol use increased with age (see Table 1a). The prevalence  
3  
4 of daily and weekly drinking in the youngest (12-17 yrs) group was notable (almost 13%). In terms  
5  
6 of sex differences, the most substantial differences were the increased rates of daily alcohol use in  
7  
8 males in the 18-19 yrs and 20-29 yrs age groups (9.3% vs. 3.6% and 15.4% vs. 8.4%, respectively).  
9

10  
11  
12 Almost one quarter (23.1%) of the younger group (12-17 yrs) used nicotine daily (see Table 1b).  
13  
14 For the older groups the rates were 36 and 41%, respectively. While there were no substantial  
15  
16 differences between younger (12-17 yr old) females and males in recent nicotine use, in the older  
17  
18 groups, the proportion of daily nicotine use was higher in males (40.9% vs. 32.0% for 18-19 yrs;  
19  
20 48.0% vs. 34.6% for 20-30 yrs).  
21  
22  
23

24  
25 Notably, for the two younger groups (12-17 yrs and 18-19 yrs), the prevalence of daily cannabis use  
26  
27 (see Table 1c) was higher than that for daily alcohol use (3.6% vs. 1.5% and 8.8% vs. 6.0%).  
28

29  
30 Almost 20% of the 12-17 yrs group used cannabis at least once in past 3 months compared to more  
31  
32 than 30% of the two older groups (33.1% and 36.0%, respectively). As with alcohol and nicotine,  
33  
34 the males in two the older age groups were more likely to report using cannabis daily.  
35  
36

37  
38 The relationships between substance and primary diagnostic categories are shown in Tables 2a, 2b  
39  
40 and 2c. There was a significant main effect of age for the 'at least weekly' alcohol drinkers in each  
41  
42 diagnostic group [ $F(6,570)=9.9, p<.001$ ]. Those with a primary diagnosis of a bipolar spectrum  
43  
44 disorder were the most likely to report at least weekly use of alcohol (at 39.4%). Within the  
45  
46 depression and psychosis groups, young males report frequent use of alcohol.  
47  
48

49  
50 There was a significant main effect of age across the diagnostic groups for 'at least weekly' users of  
51  
52 nicotine [ $F(6,749)=18.2, p<.001$ ]. The rate of 'at least weekly' use of nicotine was above 40% for  
53  
54 four of the seven diagnostic categories (see Table 2b), with psychosis having the highest rate at  
55  
56 48.7%. The greatest difference between the sexes in terms of rates of 'at least weekly' nicotine use  
57  
58 was seen in the psychosis group (37.5% vs. 53.8%).  
59  
60

1  
2 There was a significant main effect of age across the diagnostic groups for ‘at least weekly’  
3  
4 cannabis use [ $F(6,240)=6.4$ ,  $p<.001$ ]. Across all but one of the diagnostic groups males were more  
5  
6 likely to be weekly cannabis users. The group with the highest prevalence of weekly cannabis use  
7  
8 was males with ‘other’ diagnoses at 24.0%, but this was also notable in males with psychotic  
9  
10 (17.5%) or bipolar (15.4%) disorders.  
11

### 12 13 14 *Logistic Regression Models* 15

16  
17  
18 In females, for nicotine, the significant model [ $\chi^2(13)=45.2$ ,  $p<.001$ ] included only age as a  
19  
20 predictor ( $p<.01$ ). Similarly, for cannabis, the model [ $\chi^2(13)=33.2$ ,  $p<.001$ ] only included age  
21  
22 ( $p<.01$ ). For alcohol in females no model was acceptable. In males, for nicotine, the highly  
23  
24 significant model [ $\chi^2(13)=107.9$ ,  $p<.001$ ] included age ( $p<.001$ ), diagnosis ( $p<.01$ ) and age-by-  
25  
26 diagnosis ( $p<.01$ ) as predictors. Similarly, for cannabis the model [ $\chi^2(13)=59.5$ ,  $p<.001$ ] only  
27  
28 included age ( $p<.01$ ). For alcohol in males there was no acceptable model.  
29  
30  
31

### 32 33 *Detailed alcohol use* 34

35  
36  
37 Table 3 displays the demographics and social-occupational functioning of the subset (N=522)  
38  
39 sample. As predicted, abstainers (N=159) were the youngest group; ANOVA comparing age across  
40  
41 the five drinking categories was highly significant [ $F(4,521)=27.1$ ,  $p<.001$ ]. Scheffé’s post-hoc tests  
42  
43 confirmed that only the abstainers group significantly ( $p<.001$ ) differed (in age) from any other  
44  
45 group. After omitting the abstainers, there were no significant differences across the four drinking  
46  
47 categories in terms of distribution of gender or age, however there was a difference in age of  
48  
49 psychiatric onset [ $F(3,289)=3.2$ ,  $p<.05$ ].  
50  
51

52  
53  
54 Table 4 displays the proportions of individuals across the alcohol use categories by each primary  
55  
56 diagnosis group. As observed in the larger sample, the diagnosis groups were found to differ in  
57  
58 mean age [ $F(6,521)=18.4$ ,  $p<.001$ ]. In terms of ‘risky’ drinking (i.e. hazardous or harmful or high-  
59  
60

1  
2 risk) the diagnostic groups differed with the bipolar groups having the largest proportion (46.7%)  
3  
4 whereas the behavioural/developmental and ‘unclear’ groups had the lowest proportions of ‘risky’  
5  
6 drinkers (24.0% and 16.7%, respectively). A logistic regression with the dependent variable being  
7  
8 ‘no or low-risk’ drinking (i.e. abstainers and low-risk) versus ‘risky’ (the remaining three  
9  
10 categories) was found to show acceptable goodness-of-fit and a significant model [ $\chi^2(20)=6.3$ ,  
11  
12  $p<.001$ ] with only age as a predictor ( $p<.01$ ).  
13  
14

## 15 16 17 **Discussion**

18  
19  
20 Despite adolescence being the peak period for the onset of both mental and substance misuse  
21  
22 disorders, primary care based studies indicate these problems are not being effectively managed in  
23  
24 young people. National community-based surveys have indicated the extent to which young people  
25  
26 do not access care for either mental disorders or alcohol/substance misuse, and this lack of care is  
27  
28 most evident for young men and for those with alcohol/substance misuse[17].  
29  
30

31  
32  
33 This study demonstrates that among young people who present for mental health care through the  
34  
35 *headspace* network, alcohol, nicotine or cannabis uses are common. Given the comorbidity with  
36  
37 significant mental health problems, these patterns of substance use are likely to contribute to  
38  
39 increased risk of poor physical and/or mental health outcomes. The prevalence of any lifetime use  
40  
41 of both nicotine and cannabis was higher in this YMH cohort compared to general population[13]  
42  
43 rates observed in individuals aged 14 or higher (61.8% vs. 42.2%; and 47.8% vs. 35.4%,  
44  
45 respectively).  
46  
47

48  
49  
50 The youngest patient group (12-17 yrs) was twice as likely to report weekly alcohol use compared  
51  
52 to their general population peers (10.3% vs. 5.3%)<sup>13</sup>. Daily alcohol use in this YMH cohort was  
53  
54 more than three times greater than that observed in the general population (across age groups)[13].  
55  
56 Similarly, daily nicotine use in the YMH cohort is twice as high as the general population  
57  
58  
59  
60

1  
2 estimates[13]. These comparisons should be treated somewhat cautiously as the NDSHS[13]  
3  
4 determined frequency use over the past 12 months whereas this study assessed the past 3 months.  
5  
6

7  
8 The relationships between recent substance use and diagnosis were complex, and were mainly  
9  
10 affected by both age and gender. The logistic regressions models for nicotine or cannabis use were  
11  
12 acceptable and in three of these models, only age was a significant predictor of weekly use; the  
13  
14 exception being nicotine use in males where age and diagnosis both contributed. The difference in  
15  
16 the prevalences of weekly nicotine use among males with an anxiety disorder as compared to males  
17  
18 with a psychotic disorder is notable. In general, weekly substance use appeared to be more likely if  
19  
20 an individual was an older male and diagnosed with psychosis or bipolar disorder.  
21  
22

23  
24  
25 Information regarding the prevalence of frequent substance use among younger people seeking  
26  
27 mental health care is limited. There is a general consensus that substance misuse in individuals with  
28  
29 a mental disorder is common[6, 18, 19]; with evidence to suggest that ‘problematic substance use is  
30  
31 the most common comorbid condition among people with a major mental illness and is associated  
32  
33 with poorer patient outcomes’[20]. In a large cross-sectional study of over 45,000 Australians  
34  
35 attending primary care, 12% of respondents were identified as having any mental disorder with  
36  
37 concurrent substance misuse[18].  
38  
39

40  
41  
42 Of considerable relevance to preventing later poor physical health, at least weekly nicotine use was  
43  
44 highly prevalent in those with psychosis (almost 50%). In an Australian study[21] of 1,812  
45  
46 individuals with severe psychotic disorders, for those aged 18-24 years the rate of nicotine use was  
47  
48 70.6%. When adopting the same parameters, albeit over the past 3 months, the current study yields  
49  
50 a rate of 62.6% among young people who are early in the course of their disorder.  
51  
52

53  
54 The presence of an anxiety or mood disorder has been shown to be the largest determinant of  
55  
56 treatment seeking in cannabis users, regardless of the level of use[22]. A recent study[23] utilising a  
57  
58 cohort of Australian secondary school students, reported that by the time participants reached 29  
59  
60

1  
2 years their daily cannabis use was significantly associated with an anxiety disorder. In the current  
3  
4 study, frequent cannabis use was particularly common in females with an affective disorder,  
5  
6 whereas for males other diagnoses (including psychosis and bipolar disorder) tended to be  
7  
8 associated with increased rates of frequent use.  
9

10  
11  
12 Among the subset of YMH patients (N=522) the prevalence of low-risk drinkers (34%) is the same  
13  
14 as that predicted in the population[13]. However, the rates of risky (i.e. hazardous: 20%, harmful:  
15  
16 7% plus high-risk: 9%) YMH drinkers are substantially higher than in the general population  
17  
18 (23%)[13]. Notably, other research[24, 25] has found that hazardous levels of alcohol use tends to  
19  
20 peak in the 20-25 year age range suggesting that, if left untreated, there may be an escalation in  
21  
22 problematic use in the risky drinking groups. With regards to risky drinking categories, key  
23  
24 diagnostic groups (i.e. bipolar and psychosis) tended to have the higher rates of risky drinkers.  
25  
26  
27  
28

29  
30 This study is limited by several factors. Firstly, the key substance use measures were self-report  
31  
32 only and not confirmed by interview. Furthermore, participants were not asked about the amount of  
33  
34 nicotine and cannabis use only the recent (past three month) frequency of use. Follow-up  
35  
36 longitudinal studies of these patients would be important to determine the long-term patterns of  
37  
38 such substance use. Despite these limitations, this study shows that frequent use of alcohol, nicotine  
39  
40 or cannabis use in young people seeking mental health care is common. Given restricted legal  
41  
42 access, and in comparison to their peers in the general population, the patterns of use in the YMH  
43  
44 patients aged 12-17 years are particularly notable. Reductions in use of these substances needs to be  
45  
46 prioritised within services provided to these at-risk young people.  
47  
48  
49  
50  
51  
52  
53  
54  
55  
56  
57  
58  
59  
60

## References

1. National Health & Hospitals Reform Commission. A healthier future for all Australians: final report June 2009. Australian Government, Canberra, 2009.
2. Loxley W, Toumbourou JW, Stockwell T, et al. The prevention of substance use, risk and harm in Australia: A review of the evidence. The National Drug Research Institute and the Centre for Adolescent Health. Australian Government, Canberra, 2004.
3. Calabria B, Swift W, Slade T, et al. The perceived health risks of cannabis use in an Australian household survey. *Drug Alc Rev* 2012; **31**: 809-12.
4. Merikangas KR, Mehta RL, Molnar BE, et al. Comorbidity of substance use disorders with mood and anxiety disorders: results of the International Consortium in Psychiatric Epidemiology. *Addict Behav* 1998; **23**: 893-907.
5. Grant BF. Comorbidity between DSM-IV drug use disorders and major depression: results of a national survey of adults. *J Subst Abuse* 1995; **7**: 481-97.
6. Grant BF, Stinson FS, Dawson DA, et al. Prevalence and co-occurrence of substance use disorders and independent mood and anxiety disorders: results from the National Epidemiologic Survey on Alcohol and Related Conditions. *Arch Gen Psychiatry* 2004; **61**: 807-16.
7. Squeglia LM, Jacobus J, Tapert SF. The influence of substance use on adolescent brain development. *Clin EEG Neurosci*. 2009; **40**: 31-8.
8. Wyman L, Crum RM, Celentano D. Depressed mood and cause-specific mortality: a 40-year general community assessment. *Ann Epidemiol* 2012; **22**: 638-43.
9. McGorry PD, Tanti C, Stokes R, et al. headspace: Australia's National Youth Mental Health Foundation - where young minds come first. *Med J Aust* 2007; **187** (7 Suppl): S68-70.
10. Hamilton BA, Naismith SL, Scott EM, et al. Disability is already pronounced in young people with early stages of affective disorders: Data from an early intervention service. *J Affect Disord* 2011; **131**: 84-91.
11. Scott EM, Hermens DF, Glozier N, et al. Targeted primary care-based mental health services for young Australians. *Med J Aust* 2012; **196**: 136-40.
12. Humeniuk R, Ali R, Babor TF, et al. Validation of the Alcohol, Smoking And Substance Involvement Screening Test (ASSIST). *Addiction* 2008; **103**: 1039-47.

- 1  
2  
3 13. Australian Institute of Health & Wellbeing. 2010 National Drug Strategy Household Survey  
4 report. Canberra: Australian Institute of Health and Welfare, 2011.
- 5  
6 14. Goldman HH, Skodol AE, Lave TR. Revising axis V for DSM-IV: a review of measures of  
7 social functioning. *Am J Psychiatry* 1992; **149**: 1148-156.
- 8  
9 15. Saunders JB, Aasland OG, Babor TF, et al. Development of the Alcohol Use Disorders  
10 Identification Test (AUDIT): WHO Collaborative Project on Early Detection of Persons with  
11 Harmful Alcohol Consumption-II. *Addiction* 1993; **88**: 791-804.
- 12  
13 16. Allen JP, Litten RZ, Fertig JB, et al. A Review of Research on the Alcohol Use Disorders  
14 Identification Test (AUDIT). *Alc Clin Exp Res* 1997; **21**: 613-9.
- 15  
16 17. Burgess PM, Pirkis JE, Slade TN, et al. Service use for mental health problems: findings  
17 from the 2007 National Survey of Mental Health and Wellbeing. *Aust N Z J Psychiatry* 2009; **43**:  
18 615-23.
- 19  
20 18. Hickie IB, Koschera A, Davenport TA, et al. Comorbidity of common mental disorders and  
21 alcohol or other substance misuse in Australian general practice. *Med J Aust* 2001; **175** (Suppl):  
22 S31-6.
- 23  
24 19. Merikangas KR, He J-P, Burstein M, et al. Lifetime prevalence of mental disorders in U.S.  
25 adolescents: Results from the national comorbidity survey replication adolescent supplement (NCS-  
26 A). *J Am Acad Child Adolesc Psychiatry* 2010; **49**: 980-89.
- 27  
28 20. Siegfried N. A review of comorbidity: major mental illness and problematic substance use.  
29 *Aust N Z J Psychiatry* 1998; **32**: 707-17.
- 30  
31 21. Cooper J, Mancuso SG, Borland R, et al. Tobacco smoking among people living with a  
32 psychotic illness: The second Australian survey of psychosis. *Aust N Z J Psychiatry* 2012; **46**: 851-  
33 63.
- 34  
35 22. Degenhardt L, Hall W, Lynskey M. The relationship between cannabis use, depression and  
36 anxiety among Australian adults: Findings from the National Survey of Mental Health and Well-  
37 Being. *Soc Psychiatry Psychiatric Epidem* 2001; **36**: 219-27.
- 38  
39 23. Degenhardt L, Coffey C, Romaniuk H, et al. The persistence of the association between  
40 adolescent cannabis use and common mental disorders into young adulthood. *Addiction* 2012:  
41 DOI: 10.1111/j.1360-0443.2012.04015.x.
- 42  
43  
44  
45  
46  
47  
48  
49  
50  
51  
52  
53  
54  
55  
56  
57  
58  
59  
60

1  
2  
3 24. Poelen EAP, Scholte RHJ, Engels RCME, et al. Prevalence and trends of alcohol use and  
4 misuse among adolescents and young adults in the Netherlands from 1993 to 2000. *Drug Alc*  
5 *Depend* 2005; **79**: 413-21.  
6  
7

8 25. Harford TC, Grant BF, Yi H-y, et al. Patterns of DSM-IV Alcohol Abuse and Dependence  
9 Criteria Among Adolescents and Adults: Results From the 2001 National Household Survey on  
10 Drug Abuse. *Alc Clin Exp Res* 2005; **29**: 810-28.  
11  
12  
13  
14  
15  
16  
17  
18  
19  
20  
21  
22  
23  
24  
25  
26  
27  
28  
29  
30  
31  
32  
33  
34  
35  
36  
37  
38  
39  
40  
41  
42  
43  
44  
45  
46  
47  
48  
49  
50  
51  
52  
53  
54  
55  
56  
57  
58  
59  
60

For peer review only



**Table 1a:** Recent (past 3 months) alcohol use in young (12 to 30 years) female (N=1116) and male (N=961) patients

|                       | % [n/N]         |                |                 |
|-----------------------|-----------------|----------------|-----------------|
|                       | 12 to 17 yrs    | 18 to 19 yrs   | 20 to 30 yrs    |
|                       | Female          |                |                 |
| Daily or almost daily | 1.6% [9/553]    | 3.6% [7/196]   | 8.4% [31/367]   |
| Weekly                | 11.2% [62/553]  | 33.7% [66/196] | 31.3% [115/367] |
| Less than weekly      | 36.2% [200/553] | 41.3% [81/196] | 42.2% [155/367] |
| Never                 | 51.0% [282/553] | 21.4% [42/196] | 18.0% [66/367]  |
|                       | Males           |                |                 |
| Daily or almost daily | 1.4% [7/496]    | 9.3% [13/140]  | 15.4% [50/325]  |
| Weekly                | 9.3% [46/496]   | 32.1% [45/140] | 36.9% [120/325] |
| Less than weekly      | 32.7% [162/496] | 43.6% [61/140] | 35.4% [115/325] |
| Never                 | 56.7% [281/496] | 15.0% [21/140] | 12.3% [40/325]  |

**Note:** Age-group categories were used to be consistent with 2010 National Drug Strategy Household Survey[13]

**Table 1b:** Recent (past 3 months) nicotine use in young (12 to 30 years) female (N=1119) and male (N=965) patients

|                       | % [n/N]         |                |                 |
|-----------------------|-----------------|----------------|-----------------|
|                       | 12 to 17 yrs    | 18 to 19 yrs   | 20 to 30 yrs    |
|                       | Females         |                |                 |
| Daily or almost daily | 23.0% [127/552] | 32.0% [62/194] | 34.6% [129/373] |
| Weekly                | 4.2% [23/552]   | 4.1% [8/194]   | 5.6% [21/373]   |
| Less than weekly      | 12.9% [71/552]  | 17.0% [33/194] | 12.9% [48/373]  |
| Never                 | 60.0% [331/552] | 46.9% [91/194] | 46.9% [175/373] |
|                       | Males           |                |                 |
| Daily or almost daily | 23.1% [115/497] | 40.9% [56/137] | 48.0% [159/331] |
| Weekly                | 5.0% [25/497]   | 4.4% [6/137]   | 5.7% [19/331]   |
| Less than weekly      | 9.7% [48/497]   | 5.8% [8/137]   | 10.6% [35/331]  |
| Never                 | 62.2% [309/497] | 48.9% [67/137] | 35.6% [118/331] |

**Table 1c:** Recent (past 3 months) cannabis use in young (12 to 30 years) female (N=1096) and male (N=945) patients

|                       | % [n/N]         |                 |                 |
|-----------------------|-----------------|-----------------|-----------------|
|                       | 12 to 17 yrs    | 18 to 19 yrs    | 20 to 30 yrs    |
|                       | Females         |                 |                 |
| Daily or almost daily | 3.5% [19/540]   | 6.8% [13/190]   | 7.9% [29/366]   |
| Weekly                | 2.2% [12/540]   | 3.7% [7/190]    | 6.3% [23/366]   |
| Less than weekly      | 12.4% [67/540]  | 22.1% [42/190]  | 18.6% [68/366]  |
| Never                 | 81.9% [442/540] | 67.4% [128/190] | 67.2% [246/366] |
|                       | Males           |                 |                 |
| Daily or almost daily | 3.7% [18/486]   | 11.5% [16/139]  | 14.4% [46/320]  |
| Weekly                | 4.1% [20/486]   | 7.9% [11/139]   | 8.4% [27/320]   |
| Less than weekly      | 13.8% [67/486]  | 14.4% [20/139]  | 16.9% [54/320]  |
| Never                 | 78.4% [381/486] | 66.2% [92/139]  | 60.3% [193/320] |

**Table 2a:** Proportion of ‘at least weekly’ use of alcohol across each diagnostic category in N=2077 young (12 to 30 years) female and male patients

|            | Females [N=290/1116] |                   | Males [N=281/961] |                   |
|------------|----------------------|-------------------|-------------------|-------------------|
|            | Age                  | % at least weekly | Age               | % at least weekly |
| Depression | 20.3 ± 3.5           | 24.0% [115/480]   | 20.3 ± 3.2        | 31.2% [97/311]    |
| Bipolar    | 21.8 ± 3.2           | 39.4% [43/109]    | 22.1 ± 2.6        | 39.2% [20/51]     |
| Anxiety    | 19.1 ± 3.0           | 22.9% [50/218]    | 20.3 ± 2.3        | 20.1% [31/154]    |
| Psychosis  | 20.6 ± 4.1           | 20.8% [10/48]     | 22.0 ± 3.8        | 40.8% [42/103]    |
| Beh/Dev    | 16.5 ± 2.4           | 17.8% [13/73]     | 18.7 ± 3.6        | 18.3% [32/175]    |
| Other      | 19.0 ± 2.9           | 34.9% [37/106]    | 19.7 ± 2.8        | 39.4% [39/99]     |
| Unclear    | 18.7 ± 2.6           | 26.8% [22/82]     | 19.9 ± 3.3        | 29.4% [20/68]     |

**Note:** “Other” includes autistic spectrum, learning disorder, substance use disorders, and personality disorders.

**Table 2b:** Proportion of ‘at least weekly’ use of nicotine across each diagnostic category in N=2084 young (12 to 30 years) female and male patients

|            | Females [N=370/1119] |                   | Males [N=380/965] |                   |
|------------|----------------------|-------------------|-------------------|-------------------|
|            | Age                  | % at least weekly | Age               | % at least weekly |
| Depression | 18.9 ± 3.1           | 30.5% [147/482]   | 19.2 ± 3.6        | 39.2% [122/311]   |
| Bipolar    | 20.7 ± 3.2           | 44.5% [49/110]    | 20.6 ± 3.6        | 40.4% [21/52]     |
| Anxiety    | 18.3 ± 3.1           | 24.9% [54/217]    | 19.6 ± 3.0        | 24.8% [38/153]    |
| Psychosis  | 21.3 ± 4.6           | 37.5% [18/48]     | 21.7 ± 3.5        | 53.8% [56/104]    |
| Beh/Dev    | 16.7 ± 3.2           | 41.1% [30/73]     | 17.0 ± 3.2        | 37.6% [67/178]    |
| Other      | 18.9 ± 3.1           | 36.8% [39/106]    | 19.4 ± 3.0        | 45.9% [45/98]     |
| Unclear    | 17.5 ± 2.7           | 39.8% [33/83]     | 18.6 ± 3.5        | 44.9% [31/69]     |

**Note:** “Other” includes autistic spectrum, learning disorder, substance use disorders, and personality disorders.

**Table 2c:** Proportion of ‘at least weekly’ use of cannabis across each diagnostic category in N=2041 young (12 to 30 years) female and male patients

|            | Females [N=103/1096] |                   | Males [N=138/945] |                   |
|------------|----------------------|-------------------|-------------------|-------------------|
|            | Age                  | % at least weekly | Age               | % at least weekly |
| Depression | 19.7 ± 3.0           | 8.5% [40/471]     | 20.2 ± 3.4        | 14.3% [44/307]    |
| Bipolar    | 22.3 ± 3.4           | 11.9% [13/109]    | 20.9 ± 2.6        | 15.4% [8/52]      |
| Anxiety    | 18.6 ± 3.2           | 6.6% [14/211]     | 21.0 ± 2.5        | 7.3% [11/150]     |
| Psychosis  | 21.0 ± 3.6           | 6.1% [3/49]       | 22.1 ± 3.9        | 17.5% [18/103]    |
| Beh/Dev    | 18.4 ± 3.1           | 9.9% [7/71]       | 17.0 ± 2.6        | 11.6% [20/172]    |
| Other      | 19.4 ± 3.0           | 17.1% [18/105]    | 19.2 ± 2.7        | 24.0% [23/96]     |
| Unclear    | 18.1 ± 2.2           | 10.0% [8/80]      | 18.9 ± 3.4        | 21.5% [14/65]     |

**Note:** “Other” includes autistic spectrum, learning disorder, substance use disorders, and personality disorders.

**Table 3:** Demographics and level of functioning according to AUDIT drinking category in N = 522 young (12 to 30 years) patients

|                        | Abstainers [N=159] | Low-risk [N=177] | Hazardous [N=104] | Harmful [N=36] | High-risk [N=46] |
|------------------------|--------------------|------------------|-------------------|----------------|------------------|
| % females              | 46.5               | 53.7             | 54.8              | 47.2           | 39.1             |
| Age                    | 17.1 ± 4.1         | 21.1 ± 4.2       | 20.7 ± 3.8        | 21.6 ± 3.6     | 20.8 ± 4.2       |
| Age, psychiatric onset | 13.6 ± 4.3         | 16.3 ± 4.3       | 15.7 ± 3.9        | 16.3 ± 5.2     | 13.8 ± 3.5       |
| SOFAS                  | 58.9 ± 11.1        | 59.9 ± 11.9      | 62.7 ± 11.9       | 62.4 ± 12.2    | 57.6 ± 11.0      |

**Table 4:** Prevalence of AUDIT drinking categories within each psychiatric syndrome for N = 522 young (12 to 30 years) patients

|                    | Age        | % females | Abstainers [N=159] | Low-risk [N=177] | Hazardous [N=104] | Harmful [N=36] | High-risk [N=46] |
|--------------------|------------|-----------|--------------------|------------------|-------------------|----------------|------------------|
| Depression [N=192] | 19.0 ± 4.1 | 62.0      | 29.7% (57)         | 33.9% (65)       | 21.4% (41)        | 6.2% (12)      | 8.9% (17)        |
| Bipolar [N=105]    | 21.1 ± 3.7 | 68.6      | 15.2% (16)         | 38.1% (40)       | 26.7% (28)        | 8.6% (9)       | 11.4% (12)       |
| Anxiety [N=45]     | 18.2 ± 4.3 | 42.2      | 44.4% (20)         | 26.7% (12)       | 15.6% (7)         | 8.9% (4)       | 4.4% (2)         |
| Psychosis [N=108]  | 22.5 ± 4.0 | 28.7      | 31.5% (34)         | 36.1% (39)       | 18.5% (20)        | 7.4% (8)       | 6.5% (7)         |
| Beh/Dev [N=46]     | 16.5 ± 4.1 | 23.9      | 50.0% (23)         | 26.1% (12)       | 10.9% (5)         | 2.2% (1)       | 10.9% (5)        |
| Other [N=20]       | 18.5 ± 4.2 | 35.0      | 30.0% (6)          | 35.0% (7)        | 10.0% (2)         | 10.0% (2)      | 15.0% (3)        |
| Unclear [N=6]      | 16.8 ± 4.0 | 33.3      | 50.0% (3)          | 33.3% (2)        | 16.7% (1)         | 0.0% (0)       | 0.0% (0)         |



## Funding statement

Funding for the headspace project comes from the Australian Government. The evaluation of these services is supported by an NHMRC Australian Fellowship to IBH (No. 464914). DFH was supported by a grant from the NSW Ministry of Health, Mental Health and Drug & Alcohol Office. SLN was funded by an NHMRC Clinical Research Fellowship (No. 402864). This research was further supported by NHMRC Program Grant (No. 566529) and Centres of Clinical Research Excellence Grant (No. 264611). These funding agencies had no further role in study design; in the collection, analysis and interpretation of data; in the writing of the report; and in the decision to submit the paper for publication.

## Competing interests statement

Dr Daniel Hermens is currently supported by a grant from the NSW Ministry of Health, Mental Health and Drug & Alcohol Office as well as an NHMRC Australia Fellowship (awarded to Professor Hickie). In 2007, he received honoraria for educational seminars from Janssen-Cilag.

Dr Elizabeth Scott is the (unpaid) Clinical Director of Headspace Services at the BMRI, the (unpaid) Co-ordinator of the Youth Mental Health Research Program at the BMRI, and Deputy Director of St Vincent's Private Hospital Young Adult Mental Health Unit. She has received honoraria for educational seminars related to the clinical management of depressive disorders supported by Servier and Eli-Lilly pharmaceuticals. She has participated in a national advisory board for the antidepressant compound Pristiq, manufactured by Pfizer.

Professor Hickie is a member of the Medical Advisory Panel for BUPA Health Insurance (Australia) and also a Board Member of Psychosis Australia Trust. From 2012, he is a Commissioner in Australia's new National Mental Health Commission. He was until January 2012 a director of headspace: the national youth mental health foundation. Prof Hickie was previously chief executive officer (till 2003) and clinical adviser (till 2006) of beyondblue, an Australian National Depression Initiative. He is supported principally for clinical research in depression and health services and population health initiatives related to anxiety and depression by a NHMRC Australian Medical Research Fellowship (2007-12). He has led projects for health professionals and the community supported by governmental, community agency and pharmaceutical industry partners (Wyeth, Eli Lilly, Servier, Pfizer, AstraZeneca) for the identification and management of depression and anxiety. He has received honoraria for presentations of his own work at educational seminars supported by a number of non-government organisations and the pharmaceutical industry (including Pfizer, Servier and Astra Zeneca). He has served on advisory boards convened by the pharmaceutical industry in relation to specific antidepressants, including nefazodone, duloxetine, and desvenlafaxine. He leads a new investigator-initiated study of the effects of agomelatine on

1  
2 circadian parameters (supported in part by Servier but also by other NHMRC funding) and has  
3  
4 participated in a multicentre clinical trial of agomelatine effects on sleep architecture in depression  
5  
6 and a Servier-supported study of major depression and sleep disturbance in primary care settings. In  
7  
8 addition to national and international Government-based grant bodies, investigator-initiated mental  
9  
10 health research at the BMRI he has been supported by various pharmaceutical manufacturers  
11  
12 (including Servier and Pfizer) and not-for-profit entities (including the Heart Foundation,  
13  
14 beyondblue and the BUPA Foundation).  
15  
16  
17  
18  
19  
20  
21  
22  
23  
24  
25  
26  
27  
28  
29  
30  
31  
32  
33  
34  
35  
36  
37  
38  
39  
40  
41  
42  
43  
44  
45  
46  
47  
48  
49  
50  
51  
52  
53  
54  
55  
56  
57  
58  
59  
60

**Author contributions**

DFH, EMS, SLN & IBH designed the study and wrote the protocol. DFH and ML reviewed the literature; DH, DW & ML conducted the statistical analyses. DFH, ML, DW & IBH drafted the manuscript. DH, DW, BW and SN were involved in study coordination, administration of neuropsychological and data analyses. JL & BW contributed to the study interpretation and drafts of the manuscript. All authors contributed to and have approved the final manuscript.

**Data Sharing:**

There are no additional data available.

1  
2  
3  
4  
5  
6  
7  
8  
9  
10  
11  
12  
13  
14  
15  
16  
17  
18  
19  
20  
21  
22  
23  
24  
25  
26  
27  
28  
29  
30  
31  
32  
33  
34  
35  
36  
37  
38  
39  
40  
41  
42  
43  
44  
45  
46  
47  
48  
49

For peer review only



**Frequent alcohol, nicotine or cannabis use is common in young persons presenting for mental health care: a cross-sectional study**

|                                 |                                                                                                                                                                                                                                                                                                                                                                                                             |
|---------------------------------|-------------------------------------------------------------------------------------------------------------------------------------------------------------------------------------------------------------------------------------------------------------------------------------------------------------------------------------------------------------------------------------------------------------|
| Journal:                        | <i>BMJ Open</i>                                                                                                                                                                                                                                                                                                                                                                                             |
| Manuscript ID:                  | bmjopen-2012-002229.R1                                                                                                                                                                                                                                                                                                                                                                                      |
| Article Type:                   | Research                                                                                                                                                                                                                                                                                                                                                                                                    |
| Date Submitted by the Author:   | 07-Dec-2012                                                                                                                                                                                                                                                                                                                                                                                                 |
| Complete List of Authors:       | Hermens, Daniel; Brain & Mind Research Institute , Scott, Elizabeth; Brain & Mind Research Institute, White, Django; Brain & Mind Research Institute, Lynch, Marta; Brain & Mind Research Institute, Lagopoulos, Jim; Brain & Mind Research Institute, Whitwell, Bradley; Brain & Mind Research Institute, Naismith, Sharon; Brain & Mind Research Institute, Hickie, Ian; Brain & Mind Research Institute, |
| <b>Primary Subject Heading</b>: | Mental health                                                                                                                                                                                                                                                                                                                                                                                               |
| Secondary Subject Heading:      | Addiction, Smoking and tobacco                                                                                                                                                                                                                                                                                                                                                                              |
| Keywords:                       | ALCOHOL, DEPRESSION, MENTAL HEALTH, PSYCHIATRY, Substance misuse < PSYCHIATRY, Schizophrenia & psychotic disorders < PSYCHIATRY                                                                                                                                                                                                                                                                             |
|                                 |                                                                                                                                                                                                                                                                                                                                                                                                             |

SCHOLARONE™  
Manuscripts

only

1  
2  
3  
4  
5  
6  
7  
8  
9  
10  
11  
12  
13  
14  
15  
16  
17  
18  
19  
20  
21  
22  
23  
24  
25  
26  
27  
28  
29  
30  
31  
32  
33  
34  
35  
36  
37  
38  
39  
40  
41  
42  
43  
44  
45  
46  
47  
48  
49  
50  
51  
52  
53  
54  
55  
56  
57  
58  
59  
60

# Frequent alcohol, nicotine or cannabis use is common in young persons presenting for mental health care: a cross-sectional study

Daniel F. Hermens<sup>1\*</sup>, Elizabeth M. Scott<sup>1</sup>, Django White<sup>1</sup>, Marta Lynch<sup>1</sup>, Jim Lagopoulos<sup>1</sup>, Bradley  
G. Whitwell<sup>1</sup>, Sharon L. Naismith<sup>1</sup>, Ian B. Hickie<sup>1</sup>

<sup>1</sup> Clinical Research Unit, Brain and Mind Research Institute, University of Sydney, Australia.

## \*Correspondence

Address: Brain & Mind Research Institute, University of Sydney, 100 Mallett Street, Camperdown,  
NSW 2050, Australia.

Email: [daniel.hermens@sydney.edu.au](mailto:daniel.hermens@sydney.edu.au)

Telephone: +61 2 93510529

Facsimile: +61 2 93510652

## Abstract

*Objectives:* To determine the prevalence of recent alcohol, nicotine or cannabis use in young persons presenting for mental health care.

*Design:* A cross-sectional study of young people seeking mental health care completed self-report questionnaires regarding their use of alcohol, nicotine or cannabis.

*Setting:* Data were collected from two sites as part of the national *headspace* services program.

*Participants:* 2,122 young people age 12 to 30 years provided information as part of a patient register; a subset of N=522 participants also provided more detailed information about their patterns of alcohol use.

*Outcome measures:* Prevalence levels of recent alcohol, nicotine or cannabis use within relevant age bands (12-17, 18-19 and 20-30) or primary diagnostic categories.

*Results:* The rates for use *at least weekly* of alcohol for the three age bands were 12%, 39% and 45%, and for cannabis 7%, 14% and 18%, respectively. The rates of *daily* nicotine use for the three age bands were 23%, 36% and 41%. The pattern of alcohol use was characterised by few abstainers as well as many risky drinkers. Age of onset across all three substances was approximately 15 years. Individuals who used any of the three substances more frequently were likely to be older, male or have psychotic or bipolar disorders.

*Conclusions:* Frequent use of alcohol, nicotine or cannabis use in young people seeking mental health care is common. Given restricted legal access, the patterns of use in those aged 12-17 years are particularly notable. Reductions in substance use needs to be prioritised within services for at-risk young people.



## Article summary

### *Article focus:*

- Previous studies indicate that early substance misuse increases the risk of developing a mental illness;
- Early onset mental disorders are associated with increased risk of alcohol or other substance misuse;
- In this study, we determined the rates of alcohol, nicotine or cannabis use in young persons (aged 12 to 30 years) entering mental health care.

### *Key messages:*

- Alcohol, nicotine or cannabis uses in young people who present for mental health care are common and frequent;
- Given the comorbidity with significant mental health problems, these patterns of frequent substance use are likely to contribute to increased risk of poor physical and/or mental health outcomes;
- Reductions in use of these substances needs to be prioritised within services provided to these at-risk young people.

### *Strengths and limitations of this study:*

- A cross-sectional study of a large number of young persons seeking mental health care;
- Findings in the 12 to 17 year old age group are particularly novel;
- Key substance use measures were self-report only and not confirmed by interview;
- Participants were not asked about the amount of nicotine and cannabis use.

## Introduction

Health prevention priorities in Australia include cessation of nicotine or cannabis use and reduction in alcohol-related harm[1-3]. Among those with mental illness, reductions in substance use-related harm and improved cardiovascular health are key clinical objectives. Epidemiological and longitudinal studies indicate that early substance misuse increases the risk of developing a mental illness and, conversely, early onset mental disorders are associated with increased risk of alcohol or other substance misuse[4-6].

Neurobiological studies increasingly demonstrate the adverse effects of alcohol or cannabis on brain development in teenagers and young adults[7]. Young people with mental disorders are at increased risk of later cardiovascular disease[8]. One of the most significant modifiable risk factors in this population appears to be cigarette smoking.

Within the new primary-care based mental health initiative, *headspace*: the national youth mental health foundation, a strong policy emphasis is placed on active management of alcohol or other substance-misuse problems. While it is clear that these new centres have the capacity to engage young people, the extent to which concurrent alcohol, nicotine or other substance misuse is being actively managed is yet to be identified.

From a physical health perspective, there is an urgent need to establish an early intervention agenda for these individuals who are at high risk of premature death or physical health morbidity from a range of medical conditions. Of particular note are the high rates of premature death due to cardiovascular disease in persons with depression and the prevalence of metabolic syndrome in those receiving treatments for major mood disorders. Additionally, the high rate of nicotine and cannabis use in young people with major mental health disorders puts them at risk of other smoking-related conditions.

1  
2 From a mental health perspective, there is a need to better understand the early stages of substance  
3 misuse in young people with emerging mental disorders. The identification of substance use onset  
4 and subsequent patterns of use in such young people would help early intervention approaches. In  
5 this study, we determined the rates of alcohol, nicotine or cannabis use in young persons entering  
6 mental health care. Additionally, we sought to assess the patterns of comorbidity with specific  
7 mental disorders.  
8  
9  
10  
11  
12  
13  
14

## 15 16 17 **Methods**

18  
19  
20 Participants aged 16 years or older provided their own written informed consent and  
21 parental/guardian consent was obtained for those under 16 years. The University of Sydney Human  
22 Research Ethics Committee approved the study.  
23  
24  
25  
26  
27

28  
29 *Sample:* Participants were recruited from two *headspace*[9] sites: (i) the Brain & Mind Research  
30 Institute, Camperdown; and (ii) Campbelltown (outer suburban, south-western Sydney). These  
31 services specialise in the assessment and early intervention of mental health problems in young  
32 people[10, 11]. Subjects in this study were included if they were: (i) accessing services at one of the  
33 above-mentioned *headspace* sites; (ii) between the ages of 12 and 30 years; (iii) and consented to be  
34 enrolled on a patient register. Participants were excluded if they did not have sufficient English-  
35 language skills. Thus, this study utilised data obtained from 2,122 young people (12 to 30 years)  
36 who consecutively volunteered to enter the patient register between October 2007 and June 2012. A  
37 subset of 522 participants also took part in specialised neurobiological research related to clinical  
38 outcomes. Hereafter, the entire sample (N=2,112) is referred to as the 'Youth Mental Health'  
39 (YMH) cohort. Referring clinicians were asked to determine primary and secondary diagnoses  
40 based on DSM-IV criteria. For the purposes of categorisation, clinicians were asked to select one of  
41 the following 'primary diagnosis' disorders: (i) 'depression'; (ii) 'bipolar'; (iii) 'anxiety' (including  
42 obsessive compulsive, generalised anxiety, agoraphobia/panic and social anxiety disorders); (iv)  
43  
44  
45  
46  
47  
48  
49  
50  
51  
52  
53  
54  
55  
56  
57  
58  
59  
60

1  
2 'psychosis' (including first episode and schizophrenia); (v) 'behavioural/developmental' (including  
3 attention-deficit hyperactivity, conduct, oppositional defiance and impulse control disorders); (vi)  
4 'substance use'; (vii) 'personality'; (viii) 'eating disorder'; (ix) 'autism spectrum'; (x) 'other'; and  
5  
6  
7  
8  
9 (xi) 'unclear, still assessing'.

10  
11  
12 Assessment: Clinical information was obtained via: (i) brief self-report questionnaire; and (ii)  
13 clinical assessment (detailed methods have been described previously[10, 11]).

14  
15  
16  
17  
18 *Self-report*: The questionnaire comprised basic demographic data as well as standardised  
19 questionnaires to measure common symptoms, psychosocial functioning, disability and vocational  
20 status upon entry to the service (findings reported previously[10, 11]). Participants were asked  
21 about their lifetime and current substance use using the first two items of the World Health  
22 Organization's 'alcohol, smoking and substance involvement screening test' (WHO-ASSIST)[12].  
23 In item 1, participants were asked whether they ever used: (a) tobacco (nicotine) products; (b)  
24 alcoholic beverages; or, (c) cannabis. Subsequently, item 2 asked whether their use of each  
25 substance in the *past 3 months* was: (a) 'never'; (b) 'once or twice'; (c) 'monthly'; (d) 'weekly'; (e)  
26 'daily or almost daily'.  
27  
28  
29  
30  
31  
32  
33  
34  
35  
36  
37  
38  
39

40 *Data Reduction*: As a means to compare recent alcohol, nicotine or cannabis use in the YMH cohort  
41 with that of the general population the WHO-ASSIST item 2 data were re-categorised to align with  
42 the age bands and use categories of the 2010 National Drug Strategy Household Survey  
43 (NDSHS)[13]. Thus, responses were re-categorised as: (i) 'daily or almost daily'; (ii) 'weekly'; (iii)  
44 'less than weekly' or (iv) 'never'. That is, responses of 'once or twice' and 'monthly' were  
45 collapsed to form the 'less than weekly' category. Furthermore, the YMH cohort was stratified into  
46 three age groups: (i) 12 to 17 years; (ii) 18 to 19 years; and (iii) 20 to 30 years.  
47  
48  
49  
50  
51  
52  
53  
54  
55  
56

57 *Clinical assessment*: Undertaken by psychiatrists, psychologists, mental health nurses or general  
58 practitioners with training in mental health. The assessing clinician verified key aspects such as  
59  
60

1  
2 primary and secondary diagnoses/comorbidities, vocational status, medical comorbidity and general  
3  
4 functioning via the social and occupational function assessment scale (SOFAS)[14].  
5  
6

7  
8 *Detailed assessment of alcohol use:* For the sub-sample (N=522) only, the Alcohol Use Disorders  
9  
10 Identification Test (AUDIT) was used to assess each participant's level of risky drinking in the past  
11  
12 year, as well as their lifetime familiarity[15, 16]. Total scores range of from 0-40, with a higher  
13  
14 score indicating more problematic drinking. A total score of 1 to 7 is indicative of low risk  
15  
16 drinking; total scores 8-15 indicate 'risky drinking' with a moderate risk of harm; 16-19 indicating a  
17  
18 high-risk or 'harmful' level of alcohol consumption, and 20-40 indicates a 'high-risk' level.  
19  
20

21  
22  
23 *Statistical Analyses:* Statistics were performed using SPSS for Windows 20.0. Group differences in  
24  
25 demographic and clinical variables were assessed via analysis of variance (ANOVA) or chi-square  
26  
27 tests. To determine whether age was a contributing factor to any observed differences in the  
28  
29 prevalences of recent substance use, logistic regressions were conducted with a dichotomous  
30  
31 dependent variable of substance use (e.g. 'at least weekly' versus 'less than weekly') and with  
32  
33 diagnosis and age (and their interaction) entered as predictor variables. The forced entry method  
34  
35 was employed and significant regression models were only accepted if the Hosmer-Lemeshow  
36  
37 goodness-of-fit statistic was non-significant.  
38  
39  
40

## 41 **Results**

### 42 *Lifetime use*

43  
44  
45  
46  
47  
48  
49 Among males, three quarters (75.9%; 506/667) of respondents (12 to 30 yrs) reported a lifetime use  
50  
51 of alcohol, 63.3% (401/633) a lifetime use of nicotine and more than half (57.9%; 390/673) a  
52  
53 lifetime use of cannabis. Similarly, for females, the lifetime rates were 75.6% (573/758), 60.3%  
54  
55 (290/440) and 51.3% (391/762), respectively.  
56  
57  
58  
59  
60

### *Age of first use*

For males, the self-reported 'age of first use' for each substance was as follows: (i) alcohol =  $14.6 \pm 2.4$  yrs (N=456); (ii) nicotine =  $14.0 \pm 2.6$  yrs (N=385); and (iii) cannabis =  $14.8 \pm 2.9$  yrs (N=127).

For females, the age of first use for each substance was: (i) alcohol =  $14.6 \pm 2.3$  yrs (N=531); (ii) nicotine =  $14.2 \pm 2.4$  yrs (N=414); and (iii) cannabis =  $15.6 \pm 3.0$  yrs (N=126). The age of first use of cannabis was significantly earlier in males [ $F(1, 252)=5.7, p<.05$ ].

### *Recent use*

The prevalence of each category of alcohol use increased with age (see Table 1a). The prevalence of daily and weekly drinking in the youngest (12-17 yrs) group was notable (almost 13%). In terms of sex differences, the most substantial differences were the increased rates of daily alcohol use in males in the 18-19 yrs and 20-29 yrs age groups (9.3% vs. 3.6% and 15.4% vs. 8.4%, respectively).

Almost one quarter (23.1%) of the younger group (12-17 yrs) used nicotine daily (see Table 1b).

For the older groups the rates were 36 and 41%, respectively. While there were no substantial differences between younger (12-17 yr old) females and males in recent nicotine use, in the older groups, the proportion of daily nicotine use was higher in males (40.9% vs. 32.0% for 18-19 yrs; 48.0% vs. 34.6% for 20-30 yrs).

Notably, for the two younger groups (12-17 yrs and 18-19 yrs), the prevalence of daily cannabis use (see Table 1c) was higher than that for daily alcohol use (3.6% vs. 1.5% and 8.8% vs. 6.0%).

Almost 20% of the 12-17 yrs group used cannabis at least once in past 3 months compared to more than 30% of the two older groups (33.1% and 36.0%, respectively). As with alcohol and nicotine, the males in two the older age groups were more likely to report using cannabis daily.

1  
2 In terms of combined substance use, across the entire sample, 17.8% (367/2063) of cases reported  
3  
4 'at least weekly' use of both alcohol and tobacco; this combination was more common in males (at  
5  
6 20.5%; 196/954) as compared to females (15.4%; 171/1109). Similarly, the 'at least weekly' use of:  
7  
8 (i) alcohol and cannabis; and (ii) nicotine and cannabis was higher in males (8.5% and 12.9%,  
9  
10 respectively) compared to females (5.7% and 8.8%, respectively). Notably, the combination of all  
11  
12 three substances used 'at least weekly' was at 5.4% in females (59/1096) and at 7.9% in males  
13  
14 (75/945).  
15  
16  
17  
18

19 The relationships between substance and primary diagnostic categories are shown in Tables 2a, 2b  
20  
21 and 2c. Due to some limitations (e.g. unequal sample sizes) and to facilitate interpretation, ANOVA  
22  
23 and regression analyses included only the first five diagnostic categories (i.e. depression, bipolar,  
24  
25 anxiety, psychosis and behavioural/developmental). Across the five diagnostic groups, there were  
26  
27 significant main effects of age for the 'at least weekly' alcohol drinkers in both females  
28  
29 [F(4,229)=7.9, p<.001] and males [F(4,221)=5.9, p<.001]; the behavioural/developmental group  
30  
31 was the youngest in both. Despite sex, those with a primary diagnosis of a bipolar spectrum  
32  
33 disorder were the most likely to report at least weekly use of alcohol (at 39.4%). Compared to  
34  
35 females, within the depression and psychosis groups, young males reported more frequent use of  
36  
37 alcohol.  
38  
39  
40  
41  
42

43 There were significant main effects of age across the five diagnostic groups for both female  
44  
45 [F(4,297)=10.0, p<.001] and male [F(4,297)=14.7, p<.001] 'at least weekly' users of nicotine.  
46  
47 Despite sex, the rate of 'at least weekly' use of nicotine was above 30% for four of the five main  
48  
49 diagnostic categories, with psychosis having the highest rate at 48.7%. The greatest difference  
50  
51 between the sexes in terms of rates of 'at least weekly' nicotine use was seen in the psychosis group  
52  
53 (37.5% of females vs. 53.8% of males).  
54  
55  
56  
57  
58  
59  
60

1  
2 There were significant main effects of age across the five diagnostic groups for both female  
3  
4 [F(4,76)=3.0, p<.001] and male [F(4,99)=5.9, p<.001] 'at least weekly' cannabis users. Across all  
5  
6 of the diagnostic groups males were more likely to be weekly cannabis users. The group with the  
7  
8 highest prevalence of weekly cannabis use was males with 'psychosis', at 17.5%.  
9

10  
11  
12 Among the remaining six diagnostic groups (see Tables 2a, 2b and 2c) the 'substance use' group, as  
13  
14 expected, showed the highest levels of 'at least weekly' use of alcohol, nicotine and cannabis. Of  
15  
16 note, over 63% of males with a personality disorder reported at least weekly nicotine use, compared  
17  
18 to 46% of females. Interestingly, those with 'unclear' diagnoses showed moderately high  
19  
20 prevalences of 'at least weekly' use across all three substances.  
21  
22

### 23 24 25 *Logistic Regression Models* 26

27  
28 In females, for nicotine, the significant model [ $\chi^2$  (9)=40.9, p<.001] included only age as a  
29  
30 significant predictor (p<.01). Similarly, for cannabis, the model [ $\chi^2$  (9)=21.7, p=.01] only included  
31  
32 age (p<.05). In both models, as indicated by the beta coefficients for age (0.334 and 0.308,  
33  
34 respectively), 'at least weekly' users were older. The regression model for current alcohol use in  
35  
36 females was not acceptable (at p<.01). In males, for nicotine, the highly significant model [ $\chi^2$   
37  
38 (9)=83.8, p<.001] included age (p<.001), diagnosis (p<.01) and age-by-diagnosis (p<.01) as  
39  
40 predictors. For cannabis the model [ $\chi^2$  (13)=59.5, p<.001] only included age (p<.01). As seen in  
41  
42 females, the beta coefficients for age were positive in both models (0.265 and 0.162, respectively)  
43  
44 indicating that 'at least weekly' users were older and, in the case of tobacco, more likely to be of a  
45  
46 particular diagnosis (i.e. psychosis; see Table 2b). The regression model for current alcohol use in  
47  
48 males was not acceptable (at p<.01).  
49  
50  
51

### 52 53 54 55 *Detailed alcohol use* 56 57 58 59 60



1  
2 Table 3 displays the demographics and social-occupational functioning of the subset (N=522)  
3  
4 sample. As predicted, abstainers (N=159) were the youngest group; ANOVA comparing age across  
5  
6 the five drinking categories was highly significant [ $F(4,521)=27.1, p<.001$ ]. Scheffe's post-hoc tests  
7  
8 confirmed that only the abstainers group significantly ( $p<.001$ ) differed (in age) from any other  
9  
10 group. After omitting the abstainers, there were no significant differences across the four drinking  
11  
12 categories in terms of distribution of gender or age, however there was a difference in age of  
13  
14 psychiatric onset [ $F(3,289)=3.2, p<.05$ ].  
15  
16

17  
18  
19 Table 4 displays the proportions of individuals across the alcohol use categories by each primary  
20  
21 diagnosis group. As above, ANOVA and regression analyses only included the first five diagnostic  
22  
23 groups (see Table 4). As observed in the larger sample, the five groups were found to differ in mean  
24  
25 age [ $F(4,493)=25.4, p<.001$ ]. In terms of 'risky' drinking (i.e. hazardous or harmful or high-risk)  
26  
27 the five diagnostic groups differed with the bipolar group having the largest proportion (46.7%) and  
28  
29 the behavioural/developmental group having the lowest proportions of 'risky' drinkers (25.1%). A  
30  
31 logistic regression with the dependent variable being 'no or low-risk' drinking (i.e. abstainers and  
32  
33 low-risk) versus 'risky' (the remaining three categories) was found to show acceptable goodness-of-  
34  
35 fit and a significant model [ $\chi^2(9)=27.0, p<.001$ ] however there were no significant predictors (age,  
36  
37 diagnosis, age by diagnosis).  
38  
39  
40  
41  
42

## 43 Discussion

44  
45  
46 Despite adolescence being the peak period for the onset of both mental and substance misuse  
47  
48 disorders, primary care based studies indicate these problems are not being effectively managed in  
49  
50 young people. National community-based surveys have indicated the extent to which young people  
51  
52 do not access care for either mental disorders or alcohol/substance misuse, and this lack of care is  
53  
54 most evident for young men and for those with alcohol/substance misuse[17].  
55  
56  
57  
58  
59  
60

1  
2 This is the first study to examine substance use patterns in a large sample (2000+) of young people  
3  
4 accessing *headspace* services (albeit across two sites within the metropolitan of Sydney). The data  
5  
6 presented here demonstrates that among young people who present for mental health care within the  
7  
8 *headspace* network, alcohol, nicotine or cannabis uses are common. Given the comorbidity with  
9  
10 significant mental health problems, these patterns of substance use are likely to contribute to  
11  
12 increased risk of poor physical and/or mental health outcomes. Future studies will help to determine  
13  
14 the representativeness of these data by evaluating other samples (currently there are more than 40  
15  
16 *headspace* sites nationally).  
17

18  
19  
20  
21 Compared to their age-matched peers in the general population (i.e. based on the findings of the  
22  
23 2010 NDSHS[13]) the patients in this study showed some differences in the rates of current  
24  
25 substance use. Of note, our youngest group (12-17 yrs) was twice as likely to report weekly alcohol  
26  
27 use compared to 12-17 year olds in the general population (i.e. 10.3% vs. 5.1%; see table 4.3  
28  
29 in[13]). These comparisons should be treated somewhat cautiously as the NDSHS[13] determined  
30  
31 frequency of use over the past 12 months whereas our study assessed the past 3 months;  
32  
33 furthermore, the NDSHS evaluated 'daily' use whereas we asked about 'daily or almost daily' use.  
34  
35 Noting such limitations, 'daily' alcohol use in our YMH samples was at least three times greater  
36  
37 than that observed in the general population (i.e. across the age groups;[13]). Similarly, 'daily'  
38  
39 nicotine use in our YMH samples is at least twice as high as the general population estimates (again  
40  
41 across the three age groups; see table 3.3 in[13]). With regards to 'any' recent cannabis use, our  
42  
43 older YMH samples (i.e. 18-19 yrs and 20-30 yrs) were 1.5 times more likely to report recent  
44  
45 cannabis use compared to their peers in the general population (see table 6.4 in[13]).  
46  
47  
48

49  
50  
51 In this study, the relationships between recent substance use and diagnosis were complex, and were  
52  
53 mainly affected by both age and gender. The logistic regressions models for nicotine or cannabis  
54  
55 use were acceptable and in three of these models, only age was a significant predictor of weekly  
56  
57 use; the exception being nicotine use in males where age and diagnosis both contributed. The  
58  
59  
60

1  
2 difference in the prevalences of weekly nicotine use among males with an anxiety disorder as  
3  
4 compared to males with a psychotic disorder is notable. In general, weekly substance use appeared  
5  
6 to be more likely if an individual was an older male and diagnosed with psychosis or bipolar  
7  
8 disorder.  
9

10  
11  
12 Information regarding the prevalence of frequent substance use among younger people seeking  
13  
14 mental health care is limited. There is a general consensus that substance misuse in individuals with  
15  
16 a mental disorder is common[6, 18, 19], particularly in treatment seeking populations; with  
17  
18 evidence to suggest that 'problematic substance use is the most common comorbid condition among  
19  
20 people with a major mental illness and is associated with poorer patient outcomes'[20]. In a large  
21  
22 cross-sectional study of over 45,000 Australians attending primary care, 12% of respondents were  
23  
24 identified as having any mental disorder with concurrent substance misuse[18].  
25  
26

27  
28  
29 Previous research has tended to evaluate the comorbidity of mental- and substance use- disorder in  
30  
31 broad adult samples (i.e. "18 and above"). Despite this, key associations we have observed in the  
32  
33 current YMH cohort are consistent with those observed in the literature. For example, a study of  
34  
35 over 40,000 adults in the US found that comorbid substance use and mood/anxiety disorders are  
36  
37 among the most prevalent of psychiatric disorders[21]; and notably, that bipolar disorders were  
38  
39 more strongly related to the substance use disorders than any other mood or anxiety disorder.  
40  
41 Similarly, other population based studies have demonstrated stronger associations between  
42  
43 psychosis and nicotine[22] or cannabis use[23].  
44  
45  
46  
47

48  
49 Of considerable relevance to preventing later poor physical health, at least weekly nicotine use was  
50  
51 highly prevalent in those with psychosis (almost 50%). In an Australian study[24] of 1,812  
52  
53 individuals with severe psychotic disorders, for those aged 18-24 years the rate of nicotine use was  
54  
55 70.6%. When adopting the same parameters, albeit over the past 3 months, the current study yields  
56  
57 a rate of 62.6% among young people who are early in the course of their disorder.  
58  
59  
60

1  
2 The presence of an anxiety or mood disorder has been shown to be the largest determinant of  
3  
4 treatment seeking in cannabis users, regardless of the level of use[22]. A recent study[25] utilising a  
5  
6 cohort of Australian secondary school students, reported that by the time participants reached 29  
7  
8 years their daily cannabis use was significantly associated with an anxiety disorder. In the current  
9  
10 study, frequent cannabis use was particularly common in females with an affective disorder,  
11  
12 whereas for males other diagnoses (including psychosis and bipolar disorder) tended to be  
13  
14 associated with increased rates of frequent use.  
15  
16

17  
18  
19 Among the subset of YMH patients (N=522) the prevalence of low-risk drinkers (34%) is the  
20  
21 same as that predicted in the population[13]. However, the rates of risky (i.e. hazardous: 20%,  
22  
23 harmful: 7% plus high-risk: 9%) YMH drinkers are substantially higher than in the general  
24  
25 population (23%)[13]. Notably, other research[26, 27] has found that hazardous levels of alcohol  
26  
27 use tends to peak in the 20-25 year age range suggesting that, if left untreated, there may be an  
28  
29 escalation in problematic use in the risky drinking groups. With regards to risky drinking  
30  
31 categories, key diagnostic groups (i.e. bipolar and psychosis) tended to have the higher rates of  
32  
33 risky drinkers.  
34  
35

36  
37  
38 This study is limited by several factors. Firstly, the key substance use measures were self-report  
39  
40 only and not confirmed by interview. Furthermore, participants were not asked about the amount of  
41  
42 nicotine and cannabis use only the recent (past three month) frequency of use. Follow-up  
43  
44 longitudinal studies of these patients would be important to determine the long-term patterns of  
45  
46 such substance use. Despite these limitations, this study shows that frequent use of alcohol, nicotine  
47  
48 or cannabis use in young people seeking mental health care is common. Given restricted legal  
49  
50 access, and in comparison to their peers in the general population, the patterns of use in the YMH  
51  
52 patients aged 12-17 years are particularly notable. Reductions in use of these substances needs to be  
53  
54 prioritised within services provided to these at-risk young people. Traditionally, mental health  
55  
56 services have been separate to interventions that target substance use, however, there are growing  
57  
58  
59  
60

1  
2  
3  
4  
5  
6  
7  
8  
9  
10  
11  
12  
13  
14  
15  
16  
17  
18  
19  
20  
21  
22  
23  
24  
25  
26  
27  
28  
29  
30  
31  
32  
33  
34  
35  
36  
37  
38  
39  
40  
41  
42  
43  
44  
45  
46  
47  
48  
49  
50  
51  
52  
53  
54  
55  
56  
57  
58  
59  
60

suggestions that complex young people (with comorbid mental health and substance use problems) would be most receptive to integrated rather than sequential or parallel approaches[28, 29].

For peer review only

## References

1. National Health & Hospitals Reform Commission. A healthier future for all Australians: final report June 2009. Australian Government, Canberra, 2009.
2. Loxley W, Toumbourou JW, Stockwell T, et al. The prevention of substance use, risk and harm in Australia: A review of the evidence. The National Drug Research Institute and the Centre for Adolescent Health. Australian Government, Canberra, 2004.
3. Calabria B, Swift W, Slade T, et al. The perceived health risks of cannabis use in an Australian household survey. *Drug Alc Rev* 2012; **31**: 809-12.
4. Merikangas KR, Mehta RL, Molnar BE, et al. Comorbidity of substance use disorders with mood and anxiety disorders: results of the International Consortium in Psychiatric Epidemiology. *Addict Behav* 1998; **23**: 893-907.
5. Grant BF. Comorbidity between DSM-IV drug use disorders and major depression: results of a national survey of adults. *J Subst Abuse* 1995; **7**: 481-97.
6. Grant BF, Stinson FS, Dawson DA, et al. Prevalence and co-occurrence of substance use disorders and independent mood and anxiety disorders: results from the National Epidemiologic Survey on Alcohol and Related Conditions. *Arch Gen Psychiatry* 2004; **61**: 807-16.
7. Squeglia LM, Jacobus J, Tapert SF. The influence of substance use on adolescent brain development. *Clin EEG Neurosci*. 2009; **40**: 31-8.
8. Wyman L, Crum RM, Celentano D. Depressed mood and cause-specific mortality: a 40-year general community assessment. *Ann Epidem* 2012; **22**: 638-43.
9. McGorry PD, Tanti C, Stokes R, et al. headspace: Australia's National Youth Mental Health Foundation - where young minds come first. *Med J Aust* 2007; **187** (7 Suppl): S68-70.
10. Hamilton BA, Naismith SL, Scott EM, et al. Disability is already pronounced in young people with early stages of affective disorders: Data from an early intervention service. *J Affect Disord* 2011; **131**: 84-91.
11. Scott EM, Hermens DF, Glozier N, et al. Targeted primary care-based mental health services for young Australians. *Med J Aust* 2012; **196**: 136-40.

- 1  
2  
3 12. Humeniuk R, Ali R, Babor TF, et al. Validation of the Alcohol, Smoking And Substance  
4 Involvement Screening Test (ASSIST). *Addiction* 2008; **103**: 1039-47.
- 5  
6  
7 13. Australian Institute of Health & Wellbeing. 2010 National Drug Strategy Household Survey  
8 report. Canberra: Australian Institute of Health and Welfare, 2011.
- 9  
10  
11 14. Goldman HH, Skodol AE, Lave TR. Revising axis V for DSM-IV: a review of measures of  
12 social functioning. *Am J Psychiatry* 1992; **149**: 1148-156.
- 13  
14  
15 15. Saunders JB, Aasland OG, Babor TF, et al. Development of the Alcohol Use Disorders  
16 Identification Test (AUDIT): WHO Collaborative Project on Early Detection of Persons with  
17 Harmful Alcohol Consumption-II. *Addiction* 1993; **88**: 791-804.
- 18  
19  
20  
21 16. Allen JP, Litten RZ, Fertig JB, et al. A Review of Research on the Alcohol Use Disorders  
22 Identification Test (AUDIT). *Alc Clin Exp Res* 1997; **21**: 613-9.
- 23  
24  
25  
26 17. Burgess PM, Pirkis JE, Slade TN, et al. Service use for mental health problems: findings  
27 from the 2007 National Survey of Mental Health and Wellbeing. *Aust N Z J Psychiatry* 2009; **43**:  
28 615-23.
- 29  
30  
31  
32 18. Hickie IB, Koschera A, Davenport TA, et al. Comorbidity of common mental disorders and  
33 alcohol or other substance misuse in Australian general practice. *Med J Aust* 2001; **175** (Suppl):  
34 S31-6.
- 35  
36  
37  
38 19. Merikangas KR, He J-P, Burstein M, et al. Lifetime prevalence of mental disorders in U.S.  
39 adolescents: Results from the national comorbidity survey replication adolescent supplement (NCS-  
40 A). *J Am Acad Child Adolesc Psychiatry* 2010; **49**: 980-89.
- 41  
42  
43  
44 20. Siegfried N. A review of comorbidity: major mental illness and problematic substance use.  
45 *Aust N Z J Psychiatry* 1998; **32**: 707-17.
- 46  
47  
48  
49 21. Grant BF, Stinson FS, Dawson DA, et al. Prevalence and co-occurrence of substance use  
50 disorders and independent mood and anxiety disorders: results from the National Epidemiologic  
51 Survey on Alcohol and Related Conditions. *Arch Gen Psychiatry* 2004; **61**:807-16.
- 52  
53  
54  
55  
56  
57  
58  
59  
60

- 1  
2  
3  
4  
5  
6  
7  
8  
9  
10  
11  
12  
13  
14  
15  
16  
17  
18  
19  
20  
21  
22  
23  
24  
25  
26  
27  
28  
29  
30  
31  
32  
33  
34  
35  
36  
37  
38  
39  
40  
41  
42  
43  
44  
45  
46  
47  
48  
49  
50  
51  
52  
53  
54  
55  
56  
57  
58  
59  
60
22. Degenhardt L, Hall W, Lynskey M. The relationship between cannabis use, depression and anxiety among Australian adults: Findings from the National Survey of Mental Health and Well-Being. *Soc Psychiatry Psychiatric Epidemiol* 2001; **36**: 219-27.
23. van Os J, Bak M, Hanssen M, Bijl RV, de Graaf R, Verdoux H. Cannabis use and psychosis: a longitudinal population-based study. *Am J Epidemiol* 2002; **156**:319-27.
24. Cooper J, Mancuso SG, Borland R, et al. Tobacco smoking among people living with a psychotic illness: The second Australian survey of psychosis. *Aust N Z J Psychiatry* 2012; **46**: 851-63.
25. Degenhardt L, Coffey C, Romaniuk H, et al. The persistence of the association between adolescent cannabis use and common mental disorders into young adulthood. *Addiction* 2012: DOI: 10.1111/j.1360-0443.2012.04015.x.
26. Poelen EAP, Scholte RHJ, Engels RCME, et al. Prevalence and trends of alcohol use and misuse among adolescents and young adults in the Netherlands from 1993 to 2000. *Drug Alc Depend* 2005; **79**: 413-21.
27. Harford TC, Grant BF, Yi H-y, et al. Patterns of DSM-IV Alcohol Abuse and Dependence Criteria Among Adolescents and Adults: Results From the 2001 National Household Survey on Drug Abuse. *Alc Clin Exp Res* 2005; **29**: 810-28.
28. Hides L, Lubman DI, Kay-Lambkin FJ, Baker AL. Young people with co-existing mental health and drug and alcohol problems. In: Baker A, Velleman R, eds. *Clinical Handbook of Co-existing Mental Health and Drug and Alcohol Problems*. East Sussex: Routledge, 2007:132-58.
29. Norberg M, Battisti R, Copeland J, Hermens D, Hickie I. Two Sides of the Same Coin: Cannabis Dependence and Mental Health Problems in Help-Seeking Adolescent and Young Adult Outpatients. *Int J Ment Health Addict*; doi: 10.1007/s11469-012-9378-1.



**Table 1a:** Recent (past 3 months) alcohol use in young (12 to 30 years) female (N=1116) and male (N=961) patients

|                       | % [n/N]         |                |                 |
|-----------------------|-----------------|----------------|-----------------|
|                       | 12 to 17 yrs    | 18 to 19 yrs   | 20 to 30 yrs    |
| Female                |                 |                |                 |
| Daily or almost daily | 1.6% [9/553]    | 3.6% [7/196]   | 8.4% [31/367]   |
| Weekly                | 11.2% [62/553]  | 33.7% [66/196] | 31.3% [115/367] |
| Less than weekly      | 36.2% [200/553] | 41.3% [81/196] | 42.2% [155/367] |
| Never                 | 51.0% [282/553] | 21.4% [42/196] | 18.0% [66/367]  |
| Males                 |                 |                |                 |
| Daily or almost daily | 1.4% [7/496]    | 9.3% [13/140]  | 15.4% [50/325]  |
| Weekly                | 9.3% [46/496]   | 32.1% [45/140] | 36.9% [120/325] |
| Less than weekly      | 32.7% [162/496] | 43.6% [61/140] | 35.4% [115/325] |
| Never                 | 56.7% [281/496] | 15.0% [21/140] | 12.3% [40/325]  |

**Note:** Age-group categories were used to be consistent with 2010 National Drug Strategy Household Survey[13]

**Table 1b:** Recent (past 3 months) nicotine use in young (12 to 30 years) female (N=1119) and male (N=965) patients

|                       | % [n/N]         |                |                 |
|-----------------------|-----------------|----------------|-----------------|
|                       | 12 to 17 yrs    | 18 to 19 yrs   | 20 to 30 yrs    |
| Females               |                 |                |                 |
| Daily or almost daily | 23.0% [127/552] | 32.0% [62/194] | 34.6% [129/373] |
| Weekly                | 4.2% [23/552]   | 4.1% [8/194]   | 5.6% [21/373]   |
| Less than weekly      | 12.9% [71/552]  | 17.0% [33/194] | 12.9% [48/373]  |
| Never                 | 60.0% [331/552] | 46.9% [91/194] | 46.9% [175/373] |
| Males                 |                 |                |                 |
| Daily or almost daily | 23.1% [115/497] | 40.9% [56/137] | 48.0% [159/331] |
| Weekly                | 5.0% [25/497]   | 4.4% [6/137]   | 5.7% [19/331]   |
| Less than weekly      | 9.7% [48/497]   | 5.8% [8/137]   | 10.6% [35/331]  |
| Never                 | 62.2% [309/497] | 48.9% [67/137] | 35.6% [118/331] |

**Table 1c:** Recent (past 3 months) cannabis use in young (12 to 30 years) female (N=1096) and male (N=945) patients

|                       | % [n/N]         |                 |                 |
|-----------------------|-----------------|-----------------|-----------------|
|                       | 12 to 17 yrs    | 18 to 19 yrs    | 20 to 30 yrs    |
| Females               |                 |                 |                 |
| Daily or almost daily | 3.5% [19/540]   | 6.8% [13/190]   | 7.9% [29/366]   |
| Weekly                | 2.2% [12/540]   | 3.7% [7/190]    | 6.3% [23/366]   |
| Less than weekly      | 12.4% [67/540]  | 22.1% [42/190]  | 18.6% [68/366]  |
| Never                 | 81.9% [442/540] | 67.4% [128/190] | 67.2% [246/366] |
| Males                 |                 |                 |                 |
| Daily or almost daily | 3.7% [18/486]   | 11.5% [16/139]  | 14.4% [46/320]  |
| Weekly                | 4.1% [20/486]   | 7.9% [11/139]   | 8.4% [27/320]   |
| Less than weekly      | 13.8% [67/486]  | 14.4% [20/139]  | 16.9% [54/320]  |
| Never                 | 78.4% [381/486] | 66.2% [92/139]  | 60.3% [193/320] |

**Table 2a:** Proportion of ‘at least weekly’ use of alcohol across each diagnostic category in N=2077 young (12 to 30 years) female and male patients

|                   | Females [N=290/1116] |                   | Males [N=281/961] |                   |
|-------------------|----------------------|-------------------|-------------------|-------------------|
|                   | Age                  | % at least weekly | Age               | % at least weekly |
| Depression        | 20.3 ± 3.5           | 24.0% [115/480]   | 20.3 ± 3.2        | 31.2% [97/311]    |
| Bipolar           | 21.8 ± 3.2           | 39.4% [43/109]    | 22.1 ± 2.6        | 39.2% [20/51]     |
| Anxiety           | 19.1 ± 3.0           | 22.9% [50/218]    | 20.3 ± 2.3        | 20.1% [31/154]    |
| Psychosis         | 20.6 ± 4.1           | 20.8% [10/48]     | 22.0 ± 3.8        | 40.8% [42/103]    |
| Beh/Dev           | 16.3 ± 2.4           | 17.4% [12/69]     | 18.7 ± 3.6        | 20.0% [32/160]    |
| Substance Use     | 19.8 ± 3.1           | 92.3% [12/13]     | 19.1 ± 2.8        | 63.0% [17/27]     |
| Personality       | 19.0 ± 3.1           | 37.5% [9/24]      | 17.2 ± 1.5        | 36.4% [4/11]      |
| Eating Disorder   | 19.6 ± 2.3           | 27.8% [5/18]      | 19.5 ± 0.7        | 40.0% [2/5]       |
| Autistic Spectrum | 19.0                 | 25.0% [1/4]       | 19.0              | 5.5% [1/18]       |
| Other             | 17.9 ± 2.9           | 21.6% [11/51]     | 21.1 ± 2.8        | 28.3% [15/53]     |
| Unclear           | 18.7 ± 2.6           | 26.8% [22/82]     | 19.9 ± 3.3        | 29.4% [20/68]     |

Note: “Beh/Dev” = behavioural/developmental

**Table 2b:** Proportion of ‘at least weekly’ use of nicotine across each diagnostic category in N=2084 young (12 to 30 years) female and male patients

|                   | Females [N=370/1119] |                   | Males [N=380/965] |                   |
|-------------------|----------------------|-------------------|-------------------|-------------------|
|                   | Age                  | % at least weekly | Age               | % at least weekly |
| Depression        | 18.9 ± 3.1           | 30.5% [147/482]   | 19.2 ± 3.6        | 39.2% [122/311]   |
| Bipolar           | 20.7 ± 3.2           | 44.5% [49/110]    | 20.6 ± 3.6        | 40.4% [21/52]     |
| Anxiety           | 18.3 ± 3.1           | 24.9% [54/217]    | 19.6 ± 3.0        | 24.8% [38/153]    |
| Psychosis         | 21.3 ± 4.6           | 37.5% [18/48]     | 21.7 ± 3.5        | 53.8% [56/104]    |
| Beh/Dev           | 16.7 ± 3.2           | 43.5% [30/69]     | 17.0 ± 3.2        | 39.9% [65/163]    |
| Substance Use     | 19.8 ± 3.2           | 84.6% [11/13]     | 19.3 ± 2.8        | 70.4% [19/27]     |
| Personality       | 18.1 ± 3.1           | 45.8% [11/24]     | 18.4 ± 3.2        | 63.6% [7/11]      |
| Eating Disorder   | 20.0 ± 1.7           | 17.6% [3/17]      | 19.5 ± 0.7        | 40.0% [2/5]       |
| Autistic Spectrum | na                   | na                | 15.7 ± 3.0        | 16.7% [3/18]      |
| Other             | 18.6 ± 3.3           | 26.9% [14/52]     | 19.9 ± 3.5        | 30.8% [16/52]     |
| Unclear           | 17.5 ± 2.7           | 39.8% [33/83]     | 18.6 ± 3.5        | 44.9% [31/69]     |

Note: “Beh/Dev” = behavioural/developmental

**Table 2c:** Proportion of ‘at least weekly’ use of cannabis across each diagnostic category in N=2041 young (12 to 30 years) female and male patients

|                   | Females [N=103/1096] |                   | Males [N=138/945] |                   |
|-------------------|----------------------|-------------------|-------------------|-------------------|
|                   | Age                  | % at least weekly | Age               | % at least weekly |
| Depression        | 19.7 ± 3.0           | 8.5% [40/471]     | 20.2 ± 3.4        | 14.3% [44/307]    |
| Bipolar           | 22.3 ± 3.4           | 11.9% [13/109]    | 20.9 ± 2.6        | 15.4% [8/52]      |
| Anxiety           | 18.6 ± 3.2           | 6.6% [14/211]     | 21.0 ± 2.5        | 7.3% [11/150]     |
| Psychosis         | 21.0 ± 3.6           | 6.1% [3/49]       | 22.1 ± 3.9        | 17.5% [18/103]    |
| Beh/Dev           | 18.4 ± 3.1           | 10.4% [7/67]      | 17.3 ± 2.4        | 12.1% [19/157]    |
| Substance Use     | 19.0 ± 2.9           | 61.5% [8/13]      | 18.7 ± 2.0        | 56.0% [14/25]     |
| Personality       | 19.2 ± 3.7           | 16.7% [4/24]      | 21.5 ± 4.9        | 18.2% [2/11]      |
| Eating Disorder   | 20.0 ± 1.7           | 17.6% [3/17]      | na                | na                |
| Autistic Spectrum | na                   | na                | 16.0 ± 4.2        | 11.1% [2/18]      |
| Other             | 20.0 ± 1.7           | 5.9% [3/51]       | 19.7 ± 3.7        | 11.5% [6/52]      |
| Unclear           | 18.1 ± 2.2           | 10.0% [8/80]      | 18.9 ± 3.4        | 21.5% [14/65]     |

Note: “Beh/Dev” = behavioural/developmental

**Table 3:** Demographics and level of functioning according to AUDIT drinking category in N = 522 young (12 to 30 years) patients

|                        | Abstainers [N=159] | Low-risk [N=177] | Hazardous [N=104] | Harmful [N=36] | High-risk [N=46] |
|------------------------|--------------------|------------------|-------------------|----------------|------------------|
| % females              | 46.5               | 53.7             | 54.8              | 47.2           | 39.1             |
| Age                    | 17.1 ± 4.1         | 21.1 ± 4.2       | 20.7 ± 3.8        | 21.6 ± 3.6     | 20.8 ± 4.2       |
| Age, psychiatric onset | 13.6 ± 4.3         | 16.3 ± 4.3       | 15.7 ± 3.9        | 16.3 ± 5.2     | 13.8 ± 3.5       |
| SOFAS                  | 58.9 ± 11.1        | 59.9 ± 11.9      | 62.7 ± 11.9       | 62.4 ± 12.2    | 57.6 ± 11.0      |

Note: AUDIT = alcohol use disorder identification test

**Table 4:** Prevalence of AUDIT drinking categories within each psychiatric syndrome for N = 522 young (12 to 30 years) patients

|                       | Age        | % females | Abstainers [N=159] | Low-risk [N=177] | Hazardous [N=104] | Harmful [N=36] | High-risk [N=46] |
|-----------------------|------------|-----------|--------------------|------------------|-------------------|----------------|------------------|
| Depression [N=192]    | 19.0 ± 4.1 | 62.0      | 29.7% (57)         | 33.9% (65)       | 21.4% (41)        | 6.2% (12)      | 8.9% (17)        |
| Bipolar [N=105]       | 21.1 ± 3.7 | 68.6      | 15.2% (16)         | 38.1% (40)       | 26.7% (28)        | 8.6% (9)       | 11.4% (12)       |
| Anxiety [N=45]        | 18.2 ± 4.3 | 42.2      | 44.4% (20)         | 26.7% (12)       | 15.6% (7)         | 8.9% (4)       | 4.4% (2)         |
| Psychosis [N=108]     | 22.5 ± 4.0 | 28.7      | 31.5% (34)         | 36.1% (39)       | 18.5% (20)        | 7.4% (8)       | 6.5% (7)         |
| Beh/Dev [N=44]        | 16.7 ± 4.1 | 25.0      | 47.7% (21)         | 27.3% (12)       | 11.4% (5)         | 2.3% (1)       | 11.4% (5)        |
| Subst. Use [N=1]      | 26.0       | 0.0       | 0.0% (0)           | 0.0% (0)         | 0.0% (0)          | 100.0% (1)     | 0.0% (0)         |
| Autistic Spect. [N=5] | 15.8 ± 2.3 | 0.0       | 60.0% (3)          | 20.0% (1)        | 0.0% (0)          | 0.0% (0)       | 20.0% (1)        |
| Other [N=16]          | 18.4 ± 4.1 | 43.8      | 31.2% (5)          | 37.5% (6)        | 12.5% (2)         | 6.2% (2)       | 12.5% (2)        |
| Unclear [N=6]         | 16.8 ± 4.0 | 33.3      | 50.0% (3)          | 33.3% (2)        | 16.7% (1)         | 0.0% (0)       | 0.0% (0)         |

Note: AUDIT = alcohol use disorder identification test; “Beh/Dev” = behavioural/developmental



**Funding statement**

Funding for the headspace project comes from the Australian Government. The evaluation of these services is supported by an NHMRC Australian Fellowship to IBH (No. 464914). DFH was supported by a grant from the NSW Ministry of Health, Mental Health and Drug & Alcohol Office. SLN was funded by an NHMRC Clinical Research Fellowship (No. 402864). This research was further supported by NHMRC Program Grant (No. 566529) and Centres of Clinical Research Excellence Grant (No. 264611). These funding agencies had no further role in study design; in the collection, analysis and interpretation of data; in the writing of the report; and in the decision to submit the paper for publication.

### Competing interests statement

Dr Daniel Hermens is currently supported by a grant from the NSW Ministry of Health, Mental Health and Drug & Alcohol Office as well as an NHMRC Australia Fellowship (awarded to Professor Hickie). In 2007, he received honoraria for educational seminars from Janssen-Cilag.

Dr Elizabeth Scott is the (unpaid) Clinical Director of Headspace Services at the BMRI, the (unpaid) Co-ordinator of the Youth Mental Health Research Program at the BMRI, and Deputy Director of St Vincent's Private Hospital Young Adult Mental Health Unit. She has received honoraria for educational seminars related to the clinical management of depressive disorders supported by Servier and Eli-Lilly pharmaceuticals. She has participated in a national advisory board for the antidepressant compound Pristiq, manufactured by Pfizer.

Professor Hickie is a member of the Medical Advisory Panel for BUPA Health Insurance (Australia) and also a Board Member of Psychosis Australia Trust. From 2012, he is a Commissioner in Australia's new National Mental Health Commission. He was until January 2012 a director of headspace: the national youth mental health foundation. Prof Hickie was previously chief executive officer (till 2003) and clinical adviser (till 2006) of beyondblue, an Australian National Depression Initiative. He is supported principally for clinical research in depression and health services and population health initiatives related to anxiety and depression by a NHMRC Australian Medical Research Fellowship (2007-12). He has led projects for health professionals and the community supported by governmental, community agency and pharmaceutical industry partners (Wyeth, Eli Lilly, Servier, Pfizer, AstraZeneca) for the identification and management of depression and anxiety. He

1  
2  
3 has received honoraria for presentations of his own work at educational seminars  
4 supported by a number of non-government organisations and the pharmaceutical  
5 industry (including Pfizer, Servier and Astra Zeneca). He has served on  
6  
7 advisory boards convened by the pharmaceutical industry in relation to specific  
8 antidepressants, including nefazodone, duloxetine, and desvenlafaxine. He leads a  
9  
10 new investigator-initiated study of the effects of agomelatine on circadian parameters  
11 (supported in part by Servier but also by other NHMRC funding) and has participated  
12 in a multicentre clinical trial of agomelatine effects on sleep architecture in depression  
13 and a Servier-supported study of major depression and sleep disturbance in primary  
14 care settings. In addition to national and international Government-based grant bodies,  
15 investigator-initiated mental health research at the BMRI he has been supported by  
16 various pharmaceutical manufacturers (including Servier and Pfizer) and not-for-  
17 profit entities (including the Heart Foundation, beyondblue and the BUPA  
18 Foundation).

19  
20  
21  
22  
23  
24  
25  
26  
27  
28  
29  
30  
31  
32  
33  
34  
35  
36  
37  
38  
39  
40  
41  
42  
43  
44  
45  
46  
47  
48  
49  
50  
51  
52  
53  
54  
55  
56  
57  
58  
59  
60

### Author contributions

DFH, EMS, SLN & IBH designed the study and wrote the protocol. DFH and ML reviewed the literature; DH, DW & ML conducted the statistical analyses. DFH, ML, DW & IBH drafted the manuscript. DH, DW, BW and SN were involved in study coordination, administration of neuropsychological and data analyses. JL & BW contributed to the study interpretation and drafts of the manuscript. All authors contributed to and have approved the final manuscript.

1  
2  
3  
4  
5  
6  
7  
8  
9  
10  
11  
12  
13  
14  
15  
16  
17  
18  
19  
20  
21  
22  
23  
24  
25  
26  
27  
28  
29  
30  
31  
32  
33  
34  
35  
36  
37  
38  
39  
40  
41  
42  
43  
44  
45  
46  
47  
48  
49  
50  
51  
52  
53  
54  
55  
56  
57  
58  
59  
60

## Frequent alcohol, nicotine or cannabis use is common in young persons presenting for mental health care: a cross-sectional study

Daniel F. Hermens<sup>1\*</sup>, Elizabeth M. Scott<sup>1</sup>, Django White<sup>1</sup>, Marta Lynch<sup>1</sup>, Jim Lagopoulos<sup>1</sup>, Bradley  
G. Whitwell<sup>1</sup>, Sharon L. Naismith<sup>1</sup>, Ian B. Hickie<sup>1</sup>

<sup>1</sup> Clinical Research Unit, Brain and Mind Research Institute, University of Sydney, Australia.

### \*Correspondence

Address: Brain & Mind Research Institute, University of Sydney, 100 Mallett Street, Camperdown,  
NSW 2050, Australia.

Email: [daniel.hermens@sydney.edu.au](mailto:daniel.hermens@sydney.edu.au)

Telephone: +61 2 93510529

Facsimile: +61 2 93510652

## Abstract

*Objectives:* To determine the prevalence of recent alcohol, nicotine or cannabis use in young persons presenting for mental health care.

*Design:* A cross-sectional study of young people seeking mental health care completed self-report questionnaires regarding their use of alcohol, nicotine or cannabis.

*Setting:* Data were collected from two sites as part of the national *headspace* services program.

*Participants:* 2,122 young people age 12 to 30 years provided information as part of a patient register; a subset of N=522 participants also provided more detailed information about their patterns of alcohol use.

*Outcome measures:* Prevalence levels of recent alcohol, nicotine or cannabis use within relevant age bands (12-17, 18-19 and 20-30) or primary diagnostic categories.

*Results:* The rates for use *at least weekly* of alcohol for the three age bands were 12%, 39% and 45%, and for cannabis 7%, 14% and 18%, respectively. The rates of *daily* nicotine use for the three age bands were 23%, 36% and 41%. The pattern of alcohol use was characterised by few abstainers as well as many risky drinkers. Age of onset across all three substances was approximately 15 years. Individuals who used any of the three substances more frequently were likely to be older, male or have psychotic or bipolar disorders.

*Conclusions:* Frequent use of alcohol, nicotine or cannabis use in young people seeking mental health care is common. Given restricted legal access, the patterns of use in those aged 12-17 years are particularly notable. Reductions in substance use needs to be prioritised within services for at-risk young people.

## Article summary

### *Article focus:*

- Previous studies indicate that early substance misuse increases the risk of developing a mental illness;
- Early onset mental disorders are associated with increased risk of alcohol or other substance misuse;
- In this study, we determined the rates of alcohol, nicotine or cannabis use in young persons (aged 12 to 30 years) entering mental health care.

### *Key messages:*

- Alcohol, nicotine or cannabis uses in young people who present for mental health care are common and frequent;
- Given the comorbidity with significant mental health problems, these patterns of frequent substance use are likely to contribute to increased risk of poor physical and/or mental health outcomes;
- Reductions in use of these substances needs to be prioritised within services provided to these at-risk young people.

### *Strengths and limitations of this study:*

- A cross-sectional study of a large number of young persons seeking mental health care;
- Findings in the 12 to 17 year old age group are particularly novel;
- Key substance use measures were self-report only and not confirmed by interview;
- Participants were not asked about the amount of nicotine and cannabis use.

## Introduction

Health prevention priorities in Australia include cessation of nicotine or cannabis use and reduction in alcohol-related harm[1-3]. Among those with mental illness, reductions in substance use-related harm and improved cardiovascular health are key clinical objectives. Epidemiological and longitudinal studies indicate that early substance misuse increases the risk of developing a mental illness and, conversely, early onset mental disorders are associated with increased risk of alcohol or other substance misuse[4-6].

Neurobiological studies increasingly demonstrate the adverse effects of alcohol or cannabis on brain development in teenagers and young adults[7]. Young people with mental disorders are at increased risk of later cardiovascular disease[8]. One of the most significant modifiable risk factors in this population appears to be cigarette smoking.

Within the new primary-care based mental health initiative, *headspace*: the national youth mental health foundation, a strong policy emphasis is placed on active management of alcohol or other substance-misuse problems. While it is clear that these new centres have the capacity to engage young people, the extent to which concurrent alcohol, nicotine or other substance misuse is being actively managed is yet to be identified.

From a physical health perspective, there is an urgent need to establish an early intervention agenda for these individuals who are at high risk of premature death or physical health morbidity from a range of medical conditions. Of particular note are the high rates of premature death due to cardiovascular disease in persons with depression and the prevalence of metabolic syndrome in those receiving treatments for major mood disorders. Additionally, the high rate of nicotine and cannabis use in young people with major mental health disorders puts them at risk of other smoking-related conditions.



1  
2 From a mental health perspective, there is a need to better understand the early stages of substance  
3  
4 misuse in young people with emerging mental disorders. The identification of substance use onset  
5  
6 and subsequent patterns of use in such young people would help early intervention approaches. In  
7  
8 this study, we determined the rates of alcohol, nicotine or cannabis use in young persons entering  
9  
10 mental health care. Additionally, we sought to assess the patterns of comorbidity with specific  
11  
12 mental disorders.  
13

## 14 15 16 17 **Methods**

18  
19  
20 Participants aged 16 years or older provided their own written informed consent and  
21  
22 parental/guardian consent was obtained for those under 16 years. The University of Sydney Human  
23  
24 Research Ethics Committee approved the study.  
25  
26

27  
28  
29 *Sample:* Participants were recruited from two *headspace*[9] sites: (i) the Brain & Mind Research  
30  
31 Institute, Camperdown; and (ii) Campbelltown (outer suburban, south-western Sydney). These  
32  
33 services specialise in the assessment and early intervention of mental health problems in young  
34  
35 people[10, 11]. Subjects in this study were included if they were: (i) accessing services at one of the  
36  
37 above-mentioned *headspace* sites; (ii) between the ages of 12 and 30 years; (iii) and consented to be  
38  
39 enrolled on a patient register. Participants were excluded if they did not have sufficient English-  
40  
41 language skills. Thus, this study utilised data obtained from 2,122 young people (12 to 30 years)  
42  
43 who consecutively volunteered to enter the patient register between October 2007 and June 2012. A  
44  
45 subset of 522 participants also took part in specialised neurobiological research related to clinical  
46  
47 outcomes. Hereafter, the entire sample (N=2,112) is referred to as the 'Youth Mental Health'  
48  
49 (YMH) cohort. Referring clinicians were asked to determine primary and secondary diagnoses  
50  
51 based on DSM-IV criteria. For the purposes of categorisation, clinicians were asked to select one of  
52  
53 the following 'primary diagnosis' disorders: (i) 'depression'; (ii) 'bipolar'; (iii) 'anxiety' (including  
54  
55 obsessive compulsive, generalised anxiety, agoraphobia/panic and social anxiety disorders); (iv)  
56  
57  
58  
59  
60

1  
2 'psychosis' (including first episode and schizophrenia); (v) 'behavioural/developmental' (including  
3 attention-deficit hyperactivity, conduct, oppositional defiance and impulse control disorders); (vi)  
4 'substance use'; (vii) 'personality'; (viii) 'eating disorder'; (ix) 'autism spectrum'; (x) 'other'; and  
5  
6  
7  
8  
9 (xi) 'unclear, still assessing'.

10  
11  
12 Assessment: Clinical information was obtained via: (i) brief self-report questionnaire; and (ii)  
13 clinical assessment (detailed methods have been described previously[10, 11]).

14  
15  
16  
17  
18 *Self-report*: The questionnaire comprised basic demographic data as well as standardised  
19 questionnaires to measure common symptoms, psychosocial functioning, disability and vocational  
20 status upon entry to the service (findings reported previously[10, 11]). Participants were asked  
21 about their lifetime and current substance use using the first two items of the World Health  
22 Organization's 'alcohol, smoking and substance involvement screening test' (WHO-ASSIST)[12].  
23 In item 1, participants were asked whether they ever used: (a) tobacco (nicotine) products; (b)  
24 alcoholic beverages; or, (c) cannabis. Subsequently, item 2 asked whether their use of each  
25 substance in the *past 3 months* was: (a) 'never'; (b) 'once or twice'; (c) 'monthly'; (d) 'weekly'; (e)  
26 'daily or almost daily'.  
27  
28  
29  
30  
31  
32  
33  
34  
35  
36  
37  
38  
39

40  
41 *Data Reduction*: As a means to compare recent alcohol, nicotine or cannabis use in the YMH cohort  
42 with that of the general population the WHO-ASSIST item 2 data were re-categorised to align with  
43 the age bands and use categories of the 2010 National Drug Strategy Household Survey  
44 (NDSHS)[13]. Thus, responses were re-categorised as: (i) 'daily or almost daily'; (ii) 'weekly'; (iii)  
45 'less than weekly' or (iv) 'never'. That is, responses of 'once or twice' and 'monthly' were  
46 collapsed to form the 'less than weekly' category. Furthermore, the YMH cohort was stratified into  
47 three age groups: (i) 12 to 17 years; (ii) 18 to 19 years; and (iii) 20 to 30 years.  
48  
49  
50  
51  
52  
53  
54  
55  
56

57  
58 *Clinical assessment*: Undertaken by psychiatrists, psychologists, mental health nurses or general  
59 practitioners with training in mental health. The assessing clinician verified key aspects such as  
60

1  
2 primary and secondary diagnoses/comorbidities, vocational status, medical comorbidity and general  
3  
4 functioning via the social and occupational function assessment scale (SOFAS)[14].  
5  
6

7  
8 *Detailed assessment of alcohol use:* For the sub-sample (N=522) only, the Alcohol Use Disorders  
9  
10 Identification Test (AUDIT) was used to assess each participant's level of risky drinking in the past  
11  
12 year, as well as their lifetime familiarity[15, 16]. Total scores range of from 0-40, with a higher  
13  
14 score indicating more problematic drinking. A total score of 1 to 7 is indicative of low risk  
15  
16 drinking; total scores 8-15 indicate 'risky drinking' with a moderate risk of harm; 16-19 indicating a  
17  
18 high-risk or 'harmful' level of alcohol consumption, and 20-40 indicates a 'high-risk' level.  
19  
20

21  
22  
23 *Statistical Analyses:* Statistics were performed using SPSS for Windows 20.0. Group differences in  
24  
25 demographic and clinical variables were assessed via analysis of variance (ANOVA) or chi-square  
26  
27 tests. To determine whether age was a contributing factor to any observed differences in the  
28  
29 prevalences of recent substance use, logistic regressions were conducted with a dichotomous  
30  
31 dependent variable of substance use (e.g. 'at least weekly' versus 'less than weekly') and with  
32  
33 diagnosis and age (and their interaction) entered as predictor variables. The forced entry method  
34  
35 was employed and significant regression models were only accepted if the Hosmer-Lemeshow  
36  
37 goodness-of-fit statistic was non-significant.  
38  
39  
40

## 41 **Results**

### 42 *Lifetime use*

43  
44  
45  
46  
47  
48  
49 Among males, three quarters (75.9%; 506/667) of respondents (12 to 30 yrs) reported a lifetime use  
50  
51 of alcohol, 63.3% (401/633) a lifetime use of nicotine and more than half (57.9%; 390/673) a  
52  
53 lifetime use of cannabis. Similarly, for females, the lifetime rates were 75.6% (573/758), 60.3%  
54  
55 (290/440) and 51.3% (391/762), respectively.  
56  
57  
58  
59  
60

### *Age of first use*

For males, the self-reported 'age of first use' for each substance was as follows: (i) alcohol =  $14.6 \pm 2.4$  yrs (N=456); (ii) nicotine =  $14.0 \pm 2.6$  yrs (N=385); and (iii) cannabis =  $14.8 \pm 2.9$  yrs (N=127).

For females, the age of first use for each substance was: (i) alcohol =  $14.6 \pm 2.3$  yrs (N=531); (ii) nicotine =  $14.2 \pm 2.4$  yrs (N=414); and (iii) cannabis =  $15.6 \pm 3.0$  yrs (N=126). The age of first use of cannabis was significantly earlier in males [ $F(1, 252)=5.7, p<.05$ ].

### *Recent use*

The prevalence of each category of alcohol use increased with age (see Table 1a). The prevalence of daily and weekly drinking in the youngest (12-17 yrs) group was notable (almost 13%). In terms of sex differences, the most substantial differences were the increased rates of daily alcohol use in males in the 18-19 yrs and 20-29 yrs age groups (9.3% vs. 3.6% and 15.4% vs. 8.4%, respectively).

Almost one quarter (23.1%) of the younger group (12-17 yrs) used nicotine daily (see Table 1b).

For the older groups the rates were 36 and 41%, respectively. While there were no substantial differences between younger (12-17 yr old) females and males in recent nicotine use, in the older groups, the proportion of daily nicotine use was higher in males (40.9% vs. 32.0% for 18-19 yrs; 48.0% vs. 34.6% for 20-30 yrs).

Notably, for the two younger groups (12-17 yrs and 18-19 yrs), the prevalence of daily cannabis use (see Table 1c) was higher than that for daily alcohol use (3.6% vs. 1.5% and 8.8% vs. 6.0%).

Almost 20% of the 12-17 yrs group used cannabis at least once in past 3 months compared to more than 30% of the two older groups (33.1% and 36.0%, respectively). As with alcohol and nicotine, the males in two the older age groups were more likely to report using cannabis daily.

1  
2 In terms of combined substance use, across the entire sample, 17.8% (367/2063) of cases reported  
3  
4 'at least weekly' use of both alcohol and tobacco; this combination was more common in males (at  
5  
6 20.5%; 196/954) as compared to females (15.4%; 171/1109). Similarly, the 'at least weekly' use of:  
7  
8 (i) alcohol and cannabis; and (ii) nicotine and cannabis was higher in males (8.5% and 12.9%,  
9  
10 respectively) compared to females (5.7% and 8.8%, respectively). Notably, the combination of all  
11  
12 three substances used 'at least weekly' was at 5.4% in females (59/1096) and at 7.9% in males  
13  
14 (75/945).  
15  
16

17  
18 The relationships between substance and primary diagnostic categories are shown in Tables 2a, 2b  
19  
20 and 2c. Due to some limitations (e.g. unequal sample sizes) and to facilitate interpretation, ANOVA  
21  
22 and regression analyses included only the first five diagnostic categories (i.e. depression, bipolar,  
23  
24 anxiety, psychosis and behavioural/developmental). Across the five diagnostic groups, there were  
25  
26 significant main effects of age for the 'at least weekly' alcohol drinkers in both females  
27  
28 [F(4,229)=7.9, p<.001] and males [F(4,221)=5.9, p<.001]; the behavioural/developmental group  
29  
30 was the youngest in both. Despite sex, those with a primary diagnosis of a bipolar spectrum  
31  
32 disorder were the most likely to report at least weekly use of alcohol (at 39.4%). Compared to  
33  
34 females, within the depression and psychosis groups, young males reported more frequent use of  
35  
36 alcohol.  
37  
38  
39

40  
41  
42 There were significant main effects of age across the five diagnostic groups for both female  
43  
44 [F(4,297)=10.0, p<.001] and male [F(4,297)=14.7, p<.001] 'at least weekly' users of nicotine.  
45  
46 Despite sex, the rate of 'at least weekly' use of nicotine was above 30% for four of the five main  
47  
48 diagnostic categories, with psychosis having the highest rate at 48.7%. The greatest difference  
49  
50 between the sexes in terms of rates of 'at least weekly' nicotine use was seen in the psychosis group  
51  
52 (37.5% of females vs. 53.8% of males).  
53  
54  
55  
56  
57  
58  
59  
60

1  
2 There were significant main effects of age across the five diagnostic groups for both female  
3  
4 [F(4,76)=3.0, p<.001] and male [F(4,99)=5.9, p<.001] 'at least weekly' cannabis users. Across all  
5  
6 of the diagnostic groups males were more likely to be weekly cannabis users. The group with the  
7  
8 highest prevalence of weekly cannabis use was males with 'psychosis', at 17.5%.  
9

10  
11  
12 Among the remaining six diagnostic groups (see Tables 2a, 2b and 2c) the 'substance use' group, as  
13  
14 expected, showed the highest levels of 'at least weekly' use of alcohol, nicotine and cannabis. Of  
15  
16 note, over 63% of males with a personality disorder reported at least weekly nicotine use, compared  
17  
18 to 46% of females. Interestingly, those with 'unclear' diagnoses showed moderately high  
19  
20 prevalences of 'at least weekly' use across all three substances.  
21  
22

### 23 24 25 *Logistic Regression Models*

26  
27  
28 In females, for nicotine, the significant model [ $\chi^2$  (9)=40.9, p<.001] included only age as a  
29  
30 significant predictor (p<.01). Similarly, for cannabis, the model [ $\chi^2$  (9)=21.7, p=.01] only included  
31  
32 age (p<.05). In both models, as indicated by the beta coefficients for age (0.334 and 0.308,  
33  
34 respectively), 'at least weekly' users were older. The regression model for current alcohol use in  
35  
36 females was not acceptable (at p<.01). In males, for nicotine, the highly significant model [ $\chi^2$   
37  
38 (9)=83.8, p<.001] included age (p<.001), diagnosis (p<.01) and age-by-diagnosis (p<.01) as  
39  
40 predictors. For cannabis the model [ $\chi^2$  (13)=59.5, p<.001] only included age (p<.01). As seen in  
41  
42 females, the beta coefficients for age were positive in both models (0.265 and 0.162, respectively)  
43  
44 indicating that 'at least weekly' users were older and, in the case of tobacco, more likely to be of a  
45  
46 particular diagnosis (i.e. psychosis; see Table 2b). The regression model for current alcohol use in  
47  
48 males was not acceptable (at p<.01).  
49  
50  
51  
52

### 53 54 55 *Detailed alcohol use*

56  
57  
58  
59  
60

1  
2 Table 3 displays the demographics and social-occupational functioning of the subset (N=522)  
3  
4 sample. As predicted, abstainers (N=159) were the youngest group; ANOVA comparing age across  
5  
6 the five drinking categories was highly significant [ $F(4,521)=27.1, p<.001$ ]. Scheffe's post-hoc tests  
7  
8 confirmed that only the abstainers group significantly ( $p<.001$ ) differed (in age) from any other  
9  
10 group. After omitting the abstainers, there were no significant differences across the four drinking  
11  
12 categories in terms of distribution of gender or age, however there was a difference in age of  
13  
14 psychiatric onset [ $F(3,289)=3.2, p<.05$ ].  
15  
16

17  
18  
19 Table 4 displays the proportions of individuals across the alcohol use categories by each primary  
20  
21 diagnosis group. As above, ANOVA and regression analyses only included the first five diagnostic  
22  
23 groups (see Table 4). As observed in the larger sample, the five groups were found to differ in mean  
24  
25 age [ $F(4,493)=25.4, p<.001$ ]. In terms of 'risky' drinking (i.e. hazardous or harmful or high-risk)  
26  
27 the five diagnostic groups differed with the bipolar group having the largest proportion (46.7%) and  
28  
29 the behavioural/developmental group having the lowest proportions of 'risky' drinkers (25.1%). A  
30  
31 logistic regression with the dependent variable being 'no or low-risk' drinking (i.e. abstainers and  
32  
33 low-risk) versus 'risky' (the remaining three categories) was found to show acceptable goodness-of-  
34  
35 fit and a significant model [ $\chi^2(9)=27.0, p<.001$ ] however there were no significant predictors (age,  
36  
37 diagnosis, age by diagnosis).  
38  
39  
40  
41  
42

## 43 Discussion

44  
45  
46 Despite adolescence being the peak period for the onset of both mental and substance misuse  
47  
48 disorders, primary care based studies indicate these problems are not being effectively managed in  
49  
50 young people. National community-based surveys have indicated the extent to which young people  
51  
52 do not access care for either mental disorders or alcohol/substance misuse, and this lack of care is  
53  
54 most evident for young men and for those with alcohol/substance misuse[17].  
55  
56  
57  
58  
59  
60

1  
2 This is the first study to examine substance use patterns in a large sample (2000+) of young people  
3  
4 accessing *headspace* services (albeit across two sites within the metropolitan of Sydney). The data  
5  
6 presented here demonstrates that among young people who present for mental health care within the  
7  
8 *headspace* network, alcohol, nicotine or cannabis uses are common. Given the comorbidity with  
9  
10 significant mental health problems, these patterns of substance use are likely to contribute to  
11  
12 increased risk of poor physical and/or mental health outcomes. Future studies will help to determine  
13  
14 the representativeness of these data by evaluating other samples (currently there are more than 40  
15  
16 *headspace* sites nationally).  
17  
18

19  
20  
21 Compared to their age-matched peers in the general population (i.e. based on the findings of the  
22  
23 2010 NDSHS[13]) the patients in this study showed some differences in the rates of current  
24  
25 substance use. Of note, our youngest group (12-17 yrs) was twice as likely to report weekly alcohol  
26  
27 use compared to 12-17 year olds in the general population (i.e. 10.3% vs. 5.1%; see table 4.3  
28  
29 in[13]). These comparisons should be treated somewhat cautiously as the NDSHS[13] determined  
30  
31 frequency of use over the past 12 months whereas our study assessed the past 3 months;  
32  
33 furthermore, the NDSHS evaluated 'daily' use whereas we asked about 'daily or almost daily' use.  
34  
35 Noting such limitations, 'daily' alcohol use in our YMH samples was at least three times greater  
36  
37 than that observed in the general population (i.e. across the age groups;[13]). Similarly, 'daily'  
38  
39 nicotine use in our YMH samples is at least twice as high as the general population estimates (again  
40  
41 across the three age groups; see table 3.3 in[13]). With regards to 'any' recent cannabis use, our  
42  
43 older YMH samples (i.e. 18-19 yrs and 20-30 yrs) were 1.5 times more likely to report recent  
44  
45 cannabis use compared to their peers in the general population (see table 6.4 in[13]).  
46  
47  
48  
49

50  
51  
52 In this study, the relationships between recent substance use and diagnosis were complex, and were  
53  
54 mainly affected by both age and gender. The logistic regressions models for nicotine or cannabis  
55  
56 use were acceptable and in three of these models, only age was a significant predictor of weekly  
57  
58 use; the exception being nicotine use in males where age and diagnosis both contributed. The  
59  
60



1  
2 difference in the prevalences of weekly nicotine use among males with an anxiety disorder as  
3  
4 compared to males with a psychotic disorder is notable. In general, weekly substance use appeared  
5  
6 to be more likely if an individual was an older male and diagnosed with psychosis or bipolar  
7  
8 disorder.  
9

10  
11  
12 Information regarding the prevalence of frequent substance use among younger people seeking  
13  
14 mental health care is limited. There is a general consensus that substance misuse in individuals with  
15  
16 a mental disorder is common[6, 18, 19], particularly in treatment seeking populations; with  
17  
18 evidence to suggest that 'problematic substance use is the most common comorbid condition among  
19  
20 people with a major mental illness and is associated with poorer patient outcomes'[20]. In a large  
21  
22 cross-sectional study of over 45,000 Australians attending primary care, 12% of respondents were  
23  
24 identified as having any mental disorder with concurrent substance misuse[18].  
25  
26  
27  
28

29  
30 Previous research has tended to evaluate the comorbidity of mental- and substance use- disorder in  
31  
32 broad adult samples (i.e. "18 and above"). Despite this, key associations we have observed in the  
33  
34 current YMH cohort are consistent with those observed in the literature. For example, a study of  
35  
36 over 40,000 adults in the US found that comorbid substance use and mood/anxiety disorders are  
37  
38 among the most prevalent of psychiatric disorders[21]; and notably, that bipolar disorders were  
39  
40 more strongly related to the substance use disorders than any other mood or anxiety disorder.  
41  
42 Similarly, other population based studies have demonstrated stronger associations between  
43  
44 psychosis and nicotine[22] or cannabis use[23].  
45  
46  
47  
48

49  
50 Of considerable relevance to preventing later poor physical health, at least weekly nicotine use was  
51  
52 highly prevalent in those with psychosis (almost 50%). In an Australian study[24] of 1,812  
53  
54 individuals with severe psychotic disorders, for those aged 18-24 years the rate of nicotine use was  
55  
56 70.6%. When adopting the same parameters, albeit over the past 3 months, the current study yields  
57  
58 a rate of 62.6% among young people who are early in the course of their disorder.  
59  
60

1  
2 The presence of an anxiety or mood disorder has been shown to be the largest determinant of  
3  
4 treatment seeking in cannabis users, regardless of the level of use[22]. A recent study[25] utilising a  
5  
6 cohort of Australian secondary school students, reported that by the time participants reached 29  
7  
8 years their daily cannabis use was significantly associated with an anxiety disorder. In the current  
9  
10 study, frequent cannabis use was particularly common in females with an affective disorder,  
11  
12 whereas for males other diagnoses (including psychosis and bipolar disorder) tended to be  
13  
14 associated with increased rates of frequent use.  
15  
16

17  
18  
19 Among the subset of YMH patients (N=522) the prevalence of low-risk drinkers (34%) is the  
20  
21 same as that predicted in the population[13]. However, the rates of risky (i.e. hazardous: 20%,  
22  
23 harmful: 7% plus high-risk: 9%) YMH drinkers are substantially higher than in the general  
24  
25 population (23%)[13]. Notably, other research[26, 27] has found that hazardous levels of alcohol  
26  
27 use tends to peak in the 20-25 year age range suggesting that, if left untreated, there may be an  
28  
29 escalation in problematic use in the risky drinking groups. With regards to risky drinking  
30  
31 categories, key diagnostic groups (i.e. bipolar and psychosis) tended to have the higher rates of  
32  
33 risky drinkers.  
34  
35

36  
37  
38 This study is limited by several factors. Firstly, the key substance use measures were self-report  
39  
40 only and not confirmed by interview. Furthermore, participants were not asked about the amount of  
41  
42 nicotine and cannabis use only the recent (past three month) frequency of use. Follow-up  
43  
44 longitudinal studies of these patients would be important to determine the long-term patterns of  
45  
46 such substance use. Despite these limitations, this study shows that frequent use of alcohol, nicotine  
47  
48 or cannabis use in young people seeking mental health care is common. Given restricted legal  
49  
50 access, and in comparison to their peers in the general population, the patterns of use in the YMH  
51  
52 patients aged 12-17 years are particularly notable. Reductions in use of these substances needs to be  
53  
54 prioritised within services provided to these at-risk young people. Traditionally, mental health  
55  
56 services have been separate to interventions that target substance use, however, there are growing  
57  
58  
59  
60

1  
2  
3  
4  
5  
6  
7  
8  
9  
10  
11  
12  
13  
14  
15  
16  
17  
18  
19  
20  
21  
22  
23  
24  
25  
26  
27  
28  
29  
30  
31  
32  
33  
34  
35  
36  
37  
38  
39  
40  
41  
42  
43  
44  
45  
46  
47  
48  
49  
50  
51  
52  
53  
54  
55  
56  
57  
58  
59  
60

suggestions that complex young people (with comorbid mental health and substance use problems) would be most receptive to integrated rather than sequential or parallel approaches[28, 29].

For peer review only

## References

1. National Health & Hospitals Reform Commission. A healthier future for all Australians: final report June 2009. Australian Government, Canberra, 2009.
2. Loxley W, Toumbourou JW, Stockwell T, et al. The prevention of substance use, risk and harm in Australia: A review of the evidence. The National Drug Research Institute and the Centre for Adolescent Health. Australian Government, Canberra, 2004.
3. Calabria B, Swift W, Slade T, et al. The perceived health risks of cannabis use in an Australian household survey. *Drug Alc Rev* 2012; **31**: 809-12.
4. Merikangas KR, Mehta RL, Molnar BE, et al. Comorbidity of substance use disorders with mood and anxiety disorders: results of the International Consortium in Psychiatric Epidemiology. *Addict Behav* 1998; **23**: 893-907.
5. Grant BF. Comorbidity between DSM-IV drug use disorders and major depression: results of a national survey of adults. *J Subst Abuse* 1995; **7**: 481-97.
6. Grant BF, Stinson FS, Dawson DA, et al. Prevalence and co-occurrence of substance use disorders and independent mood and anxiety disorders: results from the National Epidemiologic Survey on Alcohol and Related Conditions. *Arch Gen Psychiatry* 2004; **61**: 807-16.
7. Squeglia LM, Jacobus J, Tapert SF. The influence of substance use on adolescent brain development. *Clin EEG Neurosci*. 2009; **40**: 31-8.
8. Wyman L, Crum RM, Celentano D. Depressed mood and cause-specific mortality: a 40-year general community assessment. *Ann Epidem* 2012; **22**: 638-43.
9. McGorry PD, Tanti C, Stokes R, et al. headspace: Australia's National Youth Mental Health Foundation - where young minds come first. *Med J Aust* 2007; **187** (7 Suppl): S68-70.
10. Hamilton BA, Naismith SL, Scott EM, et al. Disability is already pronounced in young people with early stages of affective disorders: Data from an early intervention service. *J Affect Disord* 2011; **131**: 84-91.
11. Scott EM, Hermens DF, Glozier N, et al. Targeted primary care-based mental health services for young Australians. *Med J Aust* 2012; **196**: 136-40.

- 1  
2  
3 12. Humeniuk R, Ali R, Babor TF, et al. Validation of the Alcohol, Smoking And Substance  
4 Involvement Screening Test (ASSIST). *Addiction* 2008; **103**: 1039-47.
- 5  
6  
7 13. Australian Institute of Health & Wellbeing. 2010 National Drug Strategy Household Survey  
8 report. Canberra: Australian Institute of Health and Welfare, 2011.
- 9  
10  
11 14. Goldman HH, Skodol AE, Lave TR. Revising axis V for DSM-IV: a review of measures of  
12 social functioning. *Am J Psychiatry* 1992; **149**: 1148-156.
- 13  
14  
15 15. Saunders JB, Aasland OG, Babor TF, et al. Development of the Alcohol Use Disorders  
16 Identification Test (AUDIT): WHO Collaborative Project on Early Detection of Persons with  
17 Harmful Alcohol Consumption-II. *Addiction* 1993; **88**: 791-804.
- 18  
19  
20  
21 16. Allen JP, Litten RZ, Fertig JB, et al. A Review of Research on the Alcohol Use Disorders  
22 Identification Test (AUDIT). *Alc Clin Exp Res* 1997; **21**: 613-9.
- 23  
24  
25  
26 17. Burgess PM, Pirkis JE, Slade TN, et al. Service use for mental health problems: findings  
27 from the 2007 National Survey of Mental Health and Wellbeing. *Aust N Z J Psychiatry* 2009; **43**:  
28 615-23.
- 29  
30  
31  
32 18. Hickie IB, Koschera A, Davenport TA, et al. Comorbidity of common mental disorders and  
33 alcohol or other substance misuse in Australian general practice. *Med J Aust* 2001; **175** (Suppl):  
34 S31-6.
- 35  
36  
37  
38 19. Merikangas KR, He J-P, Burstein M, et al. Lifetime prevalence of mental disorders in U.S.  
39 adolescents: Results from the national comorbidity survey replication adolescent supplement (NCS-  
40 A). *J Am Acad Child Adolesc Psychiatry* 2010; **49**: 980-89.
- 41  
42  
43  
44 20. Siegfried N. A review of comorbidity: major mental illness and problematic substance use.  
45 *Aust N Z J Psychiatry* 1998; **32**: 707-17.
- 46  
47  
48  
49 21. Grant BF, Stinson FS, Dawson DA, et al. Prevalence and co-occurrence of substance use  
50 disorders and independent mood and anxiety disorders: results from the National Epidemiologic  
51 Survey on Alcohol and Related Conditions. *Arch Gen Psychiatry* 2004; **61**:807-16.
- 52  
53  
54  
55  
56  
57  
58  
59  
60

- 1  
2  
3  
4  
5  
6  
7  
8  
9  
10  
11  
12  
13  
14  
15  
16  
17  
18  
19  
20  
21  
22  
23  
24  
25  
26  
27  
28  
29  
30  
31  
32  
33  
34  
35  
36  
37  
38  
39  
40  
41  
42  
43  
44  
45  
46  
47  
48  
49  
50  
51  
52  
53  
54  
55  
56  
57  
58  
59  
60
22. Degenhardt L, Hall W, Lynskey M. The relationship between cannabis use, depression and anxiety among Australian adults: Findings from the National Survey of Mental Health and Well-Being. *Soc Psychiatry Psychiatric Epidemiol* 2001; **36**: 219-27.
23. van Os J, Bak M, Hanssen M, Bijl RV, de Graaf R, Verdoux H. Cannabis use and psychosis: a longitudinal population-based study. *Am J Epidemiol* 2002; **156**:319-27.
24. Cooper J, Mancuso SG, Borland R, et al. Tobacco smoking among people living with a psychotic illness: The second Australian survey of psychosis. *Aust N Z J Psychiatry* 2012; **46**: 851-63.
25. Degenhardt L, Coffey C, Romaniuk H, et al. The persistence of the association between adolescent cannabis use and common mental disorders into young adulthood. *Addiction* 2012: DOI: 10.1111/j.1360-0443.2012.04015.x.
26. Poelen EAP, Scholte RHJ, Engels RCME, et al. Prevalence and trends of alcohol use and misuse among adolescents and young adults in the Netherlands from 1993 to 2000. *Drug Alc Depend* 2005; **79**: 413-21.
27. Harford TC, Grant BF, Yi H-y, et al. Patterns of DSM-IV Alcohol Abuse and Dependence Criteria Among Adolescents and Adults: Results From the 2001 National Household Survey on Drug Abuse. *Alc Clin Exp Res* 2005; **29**: 810-28.
28. Hides L, Lubman DI, Kay-Lambkin FJ, Baker AL. Young people with co-existing mental health and drug and alcohol problems. In: Baker A, Velleman R, eds. *Clinical Handbook of Co-existing Mental Health and Drug and Alcohol Problems*. East Sussex: Routledge, 2007:132-58.
29. Norberg M, Battisti R, Copeland J, Hermens D, Hickie I. Two Sides of the Same Coin: Cannabis Dependence and Mental Health Problems in Help-Seeking Adolescent and Young Adult Outpatients. *Int J Ment Health Addict*; doi: 10.1007/s11469-012-9378-1.

**Table 1a:** Recent (past 3 months) alcohol use in young (12 to 30 years) female (N=1116) and male (N=961) patients

|                       | % [n/N]         |                |                 |
|-----------------------|-----------------|----------------|-----------------|
|                       | 12 to 17 yrs    | 18 to 19 yrs   | 20 to 30 yrs    |
| Female                |                 |                |                 |
| Daily or almost daily | 1.6% [9/553]    | 3.6% [7/196]   | 8.4% [31/367]   |
| Weekly                | 11.2% [62/553]  | 33.7% [66/196] | 31.3% [115/367] |
| Less than weekly      | 36.2% [200/553] | 41.3% [81/196] | 42.2% [155/367] |
| Never                 | 51.0% [282/553] | 21.4% [42/196] | 18.0% [66/367]  |
| Males                 |                 |                |                 |
| Daily or almost daily | 1.4% [7/496]    | 9.3% [13/140]  | 15.4% [50/325]  |
| Weekly                | 9.3% [46/496]   | 32.1% [45/140] | 36.9% [120/325] |
| Less than weekly      | 32.7% [162/496] | 43.6% [61/140] | 35.4% [115/325] |
| Never                 | 56.7% [281/496] | 15.0% [21/140] | 12.3% [40/325]  |

**Note:** Age-group categories were used to be consistent with 2010 National Drug Strategy Household Survey[13]

**Table 1b:** Recent (past 3 months) nicotine use in young (12 to 30 years) female (N=1119) and male (N=965) patients

|                       | % [n/N]         |                |                 |
|-----------------------|-----------------|----------------|-----------------|
|                       | 12 to 17 yrs    | 18 to 19 yrs   | 20 to 30 yrs    |
| Females               |                 |                |                 |
| Daily or almost daily | 23.0% [127/552] | 32.0% [62/194] | 34.6% [129/373] |
| Weekly                | 4.2% [23/552]   | 4.1% [8/194]   | 5.6% [21/373]   |
| Less than weekly      | 12.9% [71/552]  | 17.0% [33/194] | 12.9% [48/373]  |
| Never                 | 60.0% [331/552] | 46.9% [91/194] | 46.9% [175/373] |
| Males                 |                 |                |                 |
| Daily or almost daily | 23.1% [115/497] | 40.9% [56/137] | 48.0% [159/331] |
| Weekly                | 5.0% [25/497]   | 4.4% [6/137]   | 5.7% [19/331]   |
| Less than weekly      | 9.7% [48/497]   | 5.8% [8/137]   | 10.6% [35/331]  |
| Never                 | 62.2% [309/497] | 48.9% [67/137] | 35.6% [118/331] |



Table 1c: Recent (past 3 months) cannabis use in young (12 to 30 years) female (N=1096) and male (N=945) patients

|                       | % [n/N]         |                 |                 |
|-----------------------|-----------------|-----------------|-----------------|
|                       | 12 to 17 yrs    | 18 to 19 yrs    | 20 to 30 yrs    |
| Females               |                 |                 |                 |
| Daily or almost daily | 3.5% [19/540]   | 6.8% [13/190]   | 7.9% [29/366]   |
| Weekly                | 2.2% [12/540]   | 3.7% [7/190]    | 6.3% [23/366]   |
| Less than weekly      | 12.4% [67/540]  | 22.1% [42/190]  | 18.6% [68/366]  |
| Never                 | 81.9% [442/540] | 67.4% [128/190] | 67.2% [246/366] |
| Males                 |                 |                 |                 |
| Daily or almost daily | 3.7% [18/486]   | 11.5% [16/139]  | 14.4% [46/320]  |
| Weekly                | 4.1% [20/486]   | 7.9% [11/139]   | 8.4% [27/320]   |
| Less than weekly      | 13.8% [67/486]  | 14.4% [20/139]  | 16.9% [54/320]  |
| Never                 | 78.4% [381/486] | 66.2% [92/139]  | 60.3% [193/320] |

**Table 2a:** Proportion of ‘at least weekly’ use of alcohol across each diagnostic category in N=2077 young (12 to 30 years) female and male patients

|                          | Females [N=290/1116] |                      | Males [N=281/961] |                      |
|--------------------------|----------------------|----------------------|-------------------|----------------------|
|                          | Age                  | % at least weekly    | Age               | % at least weekly    |
| Depression               | 20.3 ± 3.5           | 24.0% [115/480]      | 20.3 ± 3.2        | 31.2% [97/311]       |
| Bipolar                  | 21.8 ± 3.2           | 39.4% [43/109]       | 22.1 ± 2.6        | 39.2% [20/51]        |
| Anxiety                  | 19.1 ± 3.0           | 22.9% [50/218]       | 20.3 ± 2.3        | 20.1% [31/154]       |
| Psychosis                | 20.6 ± 4.1           | 20.8% [10/48]        | 22.0 ± 3.8        | 40.8% [42/103]       |
| Beh/Dev                  | 16.3 ± 2.4           | 17.4% [12/69]        | 18.7 ± 3.6        | 20.0% [32/160]       |
| <b>Substance Use</b>     | <b>19.8 ± 3.1</b>    | <b>92.3% [12/13]</b> | <b>19.1 ± 2.8</b> | <b>63.0% [17/27]</b> |
| <b>Personality</b>       | <b>19.0 ± 3.1</b>    | <b>37.5% [9/24]</b>  | <b>17.2 ± 1.5</b> | <b>36.4% [4/11]</b>  |
| <b>Eating Disorder</b>   | <b>19.6 ± 2.3</b>    | <b>27.8% [5/18]</b>  | <b>19.5 ± 0.7</b> | <b>40.0% [2/5]</b>   |
| <b>Autistic Spectrum</b> | <b>19.0</b>          | <b>25.0% [1/4]</b>   | <b>19.0</b>       | <b>5.5% [1/18]</b>   |
| <b>Other</b>             | <b>17.9 ± 2.9</b>    | <b>21.6% [11/51]</b> | <b>21.1 ± 2.8</b> | <b>28.3% [15/53]</b> |
| Unclear                  | 18.7 ± 2.6           | 26.8% [22/82]        | 19.9 ± 3.3        | 29.4% [20/68]        |

Note: “Beh/Dev” = behavioural/developmental

**Table 2b:** Proportion of ‘at least weekly’ use of nicotine across each diagnostic category in N=2084 young (12 to 30 years) female and male patients

|                          | Females [N=370/1119] |                      | Males [N=380/965] |                      |
|--------------------------|----------------------|----------------------|-------------------|----------------------|
|                          | Age                  | % at least weekly    | Age               | % at least weekly    |
| Depression               | 18.9 ± 3.1           | 30.5% [147/482]      | 19.2 ± 3.6        | 39.2% [122/311]      |
| Bipolar                  | 20.7 ± 3.2           | 44.5% [49/110]       | 20.6 ± 3.6        | 40.4% [21/52]        |
| Anxiety                  | 18.3 ± 3.1           | 24.9% [54/217]       | 19.6 ± 3.0        | 24.8% [38/153]       |
| Psychosis                | 21.3 ± 4.6           | 37.5% [18/48]        | 21.7 ± 3.5        | 53.8% [56/104]       |
| Beh/Dev                  | 16.7 ± 3.2           | 43.5% [30/69]        | 17.0 ± 3.2        | 39.9% [65/163]       |
| <b>Substance Use</b>     | <b>19.8 ± 3.2</b>    | <b>84.6% [11/13]</b> | <b>19.3 ± 2.8</b> | <b>70.4% [19/27]</b> |
| <b>Personality</b>       | <b>18.1 ± 3.1</b>    | <b>45.8% [11/24]</b> | <b>18.4 ± 3.2</b> | <b>63.6% [7/11]</b>  |
| <b>Eating Disorder</b>   | <b>20.0 ± 1.7</b>    | <b>17.6% [3/17]</b>  | <b>19.5 ± 0.7</b> | <b>40.0% [2/5]</b>   |
| <b>Autistic Spectrum</b> | <b>na</b>            | <b>na</b>            | <b>15.7 ± 3.0</b> | <b>16.7% [3/18]</b>  |
| <b>Other</b>             | <b>18.6 ± 3.3</b>    | <b>26.9% [14/52]</b> | <b>19.9 ± 3.5</b> | <b>30.8% [16/52]</b> |
| Unclear                  | 17.5 ± 2.7           | 39.8% [33/83]        | 18.6 ± 3.5        | 44.9% [31/69]        |

Note: “Beh/Dev” = behavioural/developmental

**Table 2c:** Proportion of ‘at least weekly’ use of cannabis across each diagnostic category in N=2041 young (12 to 30 years) female and male patients

|                   | Females [N=103/1096] |                   | Males [N=138/945] |                   |
|-------------------|----------------------|-------------------|-------------------|-------------------|
|                   | Age                  | % at least weekly | Age               | % at least weekly |
| Depression        | 19.7 ± 3.0           | 8.5% [40/471]     | 20.2 ± 3.4        | 14.3% [44/307]    |
| Bipolar           | 22.3 ± 3.4           | 11.9% [13/109]    | 20.9 ± 2.6        | 15.4% [8/52]      |
| Anxiety           | 18.6 ± 3.2           | 6.6% [14/211]     | 21.0 ± 2.5        | 7.3% [11/150]     |
| Psychosis         | 21.0 ± 3.6           | 6.1% [3/49]       | 22.1 ± 3.9        | 17.5% [18/103]    |
| Beh/Dev           | 18.4 ± 3.1           | 10.4% [7/67]      | 17.3 ± 2.4        | 12.1% [19/157]    |
| Substance Use     | 19.0 ± 2.9           | 61.5% [8/13]      | 18.7 ± 2.0        | 56.0% [14/25]     |
| Personality       | 19.2 ± 3.7           | 16.7% [4/24]      | 21.5 ± 4.9        | 18.2% [2/11]      |
| Eating Disorder   | 20.0 ± 1.7           | 17.6% [3/17]      | na                | na                |
| Autistic Spectrum | na                   | na                | 16.0 ± 4.2        | 11.1% [2/18]      |
| Other             | 20.0 ± 1.7           | 5.9% [3/51]       | 19.7 ± 3.7        | 11.5% [6/52]      |
| Unclear           | 18.1 ± 2.2           | 10.0% [8/80]      | 18.9 ± 3.4        | 21.5% [14/65]     |

Note: “Beh/Dev” = behavioural/developmental

**Table 3:** Demographics and level of functioning according to AUDIT drinking category in N = 522 young (12 to 30 years) patients

|                        | Abstainers [N=159] | Low-risk [N=177] | Hazardous [N=104] | Harmful [N=36] | High-risk [N=46] |
|------------------------|--------------------|------------------|-------------------|----------------|------------------|
| % females              | 46.5               | 53.7             | 54.8              | 47.2           | 39.1             |
| Age                    | 17.1 ± 4.1         | 21.1 ± 4.2       | 20.7 ± 3.8        | 21.6 ± 3.6     | 20.8 ± 4.2       |
| Age, psychiatric onset | 13.6 ± 4.3         | 16.3 ± 4.3       | 15.7 ± 3.9        | 16.3 ± 5.2     | 13.8 ± 3.5       |
| SOFAS                  | 58.9 ± 11.1        | 59.9 ± 11.9      | 62.7 ± 11.9       | 62.4 ± 12.2    | 57.6 ± 11.0      |

Note: AUDIT = alcohol use disorder identification test

**Table 4:** Prevalence of AUDIT drinking categories within each psychiatric syndrome for N = 522 young (12 to 30 years) patients

|                       | Age        | % females | Abstainers [N=159] | Low-risk [N=177] | Hazardous [N=104] | Harmful [N=36] | High-risk [N=46] |
|-----------------------|------------|-----------|--------------------|------------------|-------------------|----------------|------------------|
| Depression [N=192]    | 19.0 ± 4.1 | 62.0      | 29.7% (57)         | 33.9% (65)       | 21.4% (41)        | 6.2% (12)      | 8.9% (17)        |
| Bipolar [N=105]       | 21.1 ± 3.7 | 68.6      | 15.2% (16)         | 38.1% (40)       | 26.7% (28)        | 8.6% (9)       | 11.4% (12)       |
| Anxiety [N=45]        | 18.2 ± 4.3 | 42.2      | 44.4% (20)         | 26.7% (12)       | 15.6% (7)         | 8.9% (4)       | 4.4% (2)         |
| Psychosis [N=108]     | 22.5 ± 4.0 | 28.7      | 31.5% (34)         | 36.1% (39)       | 18.5% (20)        | 7.4% (8)       | 6.5% (7)         |
| Beh/Dev [N=44]        | 16.7 ± 4.1 | 25.0      | 47.7% (21)         | 27.3% (12)       | 11.4% (5)         | 2.3% (1)       | 11.4% (5)        |
| Subst. Use [N=1]      | 26.0       | 0.0       | 0.0% (0)           | 0.0% (0)         | 0.0% (0)          | 100.0% (1)     | 0.0% (0)         |
| Autistic Spect. [N=5] | 15.8 ± 2.3 | 0.0       | 60.0% (3)          | 20.0% (1)        | 0.0% (0)          | 0.0% (0)       | 20.0% (1)        |
| Other [N=16]          | 18.4 ± 4.1 | 43.8      | 31.2% (5)          | 37.5% (6)        | 12.5% (2)         | 6.2% (2)       | 12.5% (2)        |
| Unclear [N=6]         | 16.8 ± 4.0 | 33.3      | 50.0% (3)          | 33.3% (2)        | 16.7% (1)         | 0.0% (0)       | 0.0% (0)         |

Note: AUDIT = alcohol use disorder identification test; “Beh/Dev” = behavioural/developmental

**Funding statement**

Funding for the headspace project comes from the Australian Government. The evaluation of these services is supported by an NHMRC Australian Fellowship to IBH (No. 464914). DFH was supported by a grant from the NSW Ministry of Health, Mental Health and Drug & Alcohol Office. SLN was funded by an NHMRC Clinical Research Fellowship (No. 402864). This research was further supported by NHMRC Program Grant (No. 566529) and Centres of Clinical Research Excellence Grant (No. 264611). These funding agencies had no further role in study design; in the collection, analysis and interpretation of data; in the writing of the report; and in the decision to submit the paper for publication.

### Competing interests statement

Dr Daniel Hermens is currently supported by a grant from the NSW Ministry of Health, Mental Health and Drug & Alcohol Office as well as an NHMRC Australia Fellowship (awarded to Professor Hickie). In 2007, he received honoraria for educational seminars from Janssen-Cilag.

Dr Elizabeth Scott is the (unpaid) Clinical Director of Headspace Services at the BMRI, the (unpaid) Co-ordinator of the Youth Mental Health Research Program at the BMRI, and Deputy Director of St Vincent's Private Hospital Young Adult Mental Health Unit. She has received honoraria for educational seminars related to the clinical management of depressive disorders supported by Servier and Eli-Lilly pharmaceuticals. She has participated in a national advisory board for the antidepressant compound Pristiq, manufactured by Pfizer.

Professor Hickie is a member of the Medical Advisory Panel for BUPA Health Insurance (Australia) and also a Board Member of Psychosis Australia Trust. From 2012, he is a Commissioner in Australia's new National Mental Health Commission. He was until January 2012 a director of headspace: the national youth mental health foundation. Prof Hickie was previously chief executive officer (till 2003) and clinical adviser (till 2006) of beyondblue, an Australian National Depression Initiative. He is supported principally for clinical research in depression and health services and population health initiatives related to anxiety and depression by a NHMRC Australian Medical Research Fellowship (2007-12). He has led projects for health professionals and the community supported by governmental, community agency and pharmaceutical industry partners (Wyeth, Eli Lilly, Servier, Pfizer, AstraZeneca) for the identification and management of depression and anxiety. He



1  
2  
3 has received honoraria for presentations of his own work at educational seminars  
4 supported by a number of non-government organisations and the pharmaceutical  
5 industry (including Pfizer, Servier and Astra Zeneca). He has served on  
6 advisory boards convened by the pharmaceutical industry in relation to specific  
7 antidepressants, including nefazodone, duloxetine, and desvenlafaxine. He leads a  
8 new investigator-initiated study of the effects of agomelatine on circadian parameters  
9 (supported in part by Servier but also by other NHMRC funding) and has participated  
10 in a multicentre clinical trial of agomelatine effects on sleep architecture in depression  
11 and a Servier-supported study of major depression and sleep disturbance in primary  
12 care settings. In addition to national and international Government-based grant bodies,  
13 investigator-initiated mental health research at the BMRI he has been supported by  
14 various pharmaceutical manufacturers (including Servier and Pfizer) and not-for-  
15 profit entities (including the Heart Foundation, beyondblue and the BUPA  
16 Foundation).

17  
18  
19  
20  
21  
22  
23  
24  
25  
26  
27  
28  
29  
30  
31  
32  
33  
34  
35  
36  
37  
38  
39  
40  
41  
42  
43  
44  
45  
46  
47  
48  
49  
50  
51  
52  
53  
54  
55  
56  
57  
58  
59  
60

### Author contributions

DFH, EMS, SLN & IBH designed the study and wrote the protocol. DFH and ML reviewed the literature; DH, DW & ML conducted the statistical analyses. DFH, ML, DW & IBH drafted the manuscript. DH, DW, BW and SN were involved in study coordination, administration of neuropsychological and data analyses. JL & BW contributed to the study interpretation and drafts of the manuscript. All authors contributed to and have approved the final manuscript.
